1 **Tight association between microbial eukaryote and *Imitervirales* communities in**  
2 **the Pacific Arctic Ocean**

3

4 Jun Xia<sup>1</sup>, Sohiko Kameyama<sup>2</sup>, Florian Prodinge<sup>1</sup>, Takashi Yoshida<sup>3</sup>, Kyoung-Ho  
5 Cho<sup>4</sup>, Jinyoung Jung<sup>4</sup>, Sung-Ho Kang<sup>4</sup>, Eun-Jin Yang<sup>4</sup>, Hiroyuki Ogata<sup>1</sup>, Hisashi  
6 Endo<sup>1\*</sup>

7

8 <sup>1</sup> Institute for Chemical Research, Kyoto University, Gokasho, Uji 611-0011, Japan

9 <sup>2</sup> Faculty of Environmental Earth Science, Hokkaido University, N10W5 Sapporo,  
10 Hokkaido 060-0810, Japan

11 <sup>3</sup> Graduate School of Agriculture, Kyoto University, Kitashirakawa-Oiwake,  
12 Sakyo-ku, Kyoto 606-8502, Japan

13 <sup>4</sup> Korea Polar Research Institute, Incheon 21990, Republic of Korea

14

15 *Running title: Association between eukaryote and *Imitervirales**

16

17 \*For correspondence. E-mail [endo@scl.kyoto-u.ac.jp](mailto:endo@scl.kyoto-u.ac.jp); Tel. (+81) 0774-38-3272; Fax  
18 (+81) 0774-38-3269.

19

20

## 21 **Summary**

22 Viruses are important regulatory factors of marine microbial community including  
23 microeukaryotes. However, little is known about their role in the northern Chukchi  
24 Sea of the Arctic basin, which remains oligotrophic conditions in summer. To  
25 elucidate linkages of microbial eukaryotic community with viruses as well as  
26 environmental variables, we investigated the community structures of  
27 microeukaryotes (3–144  $\mu\text{m}$  and 0.2–3  $\mu\text{m}$  size fractions) and *Imitervirales* (0.2–3  $\mu\text{m}$   
28 size fraction), a major group of viruses infecting marine microeukaryotes. Surface  
29 water samples were collected at 21 ocean stations located in the northeastern Chukchi  
30 Sea (NECS), an adjacent area outside the Beaufort Gyre (Adjacent Sea; AS), and two  
31 melt ponds on sea ice in the summer of 2018. At the ocean stations, nutrient  
32 concentrations were low in most of the locations expect at the shelf in the AS. The  
33 community variations were significantly correlated between eukaryotes and  
34 *Imitervirales*, even within the NECS characterized by relatively homogeneous  
35 environmental conditions. The association of the eukaryotic community with the viral  
36 community was stronger than that with geographical and physicochemical  
37 environmental factors. These results suggest that *Imitervirales* are actively infecting  
38 their hosts even in cold and oligotrophic sea water in the Arctic Ocean.

39

40

## 41 **Introduction**

42 The Arctic Ocean is the smallest, shallowest, and coldest ocean on earth. It covers  
43 several seas including the Chukchi Sea and the Beaufort Sea. Sea ice cover the central  
44 area of the ocean slightly in summer and almost completely in winter, due to the  
45 extreme seasonality in the receipt of solar radiation in the polar area. Anthropogenic  
46 climate change is now accelerating and has a strong impact on the Arctic Ocean  
47 (Lannuzel et al., 2020; Stroeve et al., 2007). Due to the ice-albedo feedback  
48 mechanism, sea ice retreat to a greater extent in summer than before (Curry et al.,  
49 1995; Kashiwase et al., 2017; Lindsay et al., 2012). The highest surface air  
50 temperature during the past 120 years was recorded for the period between 2014 and  
51 2019 (Perovich & Jones, 2019). Upper sea water was also freshened as a result of  
52 accelerating sea ice melting, and this situation is predicted to continue (Kwok &  
53 Cunningham, 2010; Münchow, 2016; Shu et al., 2018). In such changing  
54 environmental conditions, how microorganisms form and alter their community  
55 structures through intricate interactions between them and with surrounding  
56 environments is an important general issue.

57 Microbial eukaryotes play a fundamental role in the marine ecosystem (de Vargas  
58 et al., 2015; Worden et al., 2015). Being integrated in the food web, they drive  
59 biogeochemical cycles by contributing to primary production (Falkowski et al., 1998;  
60 Field et al., 1998) and transferring fixed carbon to the higher trophic levels (Sherr et  
61 al., 2007). Primary production in surface seawater of the Arctic Ocean estimated by

62 satellite remote sensing significantly increased from 1998 to 2018, presumably due to  
63 the climate change-induced environmental modifications such as sea ice loss and an  
64 increase of nutrient influx (Lewis et al., 2020). However, another study indicated that  
65 the abundance of nanophytoplankton (2–20  $\mu\text{m}$ ) decreased from 2004 to 2008 in the  
66 Canada Basin while that of picophytoplankton (i.e., cell size of 0.2–2  $\mu\text{m}$ ) increased  
67 because of the decrease in nutrient concentrations (Li et al., 2009).

68 A first molecular biological characterization of the microbial eukaryotic  
69 community in the Arctic Ocean has been reported fifteen years ago (Lovejoy et al.,  
70 2006). Since then, several groups have carried out molecular barcoding studies to  
71 investigate the microbial eukaryotic community in a variety of areas of the Arctic  
72 Ocean such as the Chukchi Sea, the Beaufort Sea, West Spitsbergen, the Amundsen  
73 Gulf, the Bering Strait, Greenland and the central Arctic Ocean (Comeau et al., 2011;  
74 Kiliyas et al., 2014; Marquardt et al., 2016; Monier et al., 2013; Onda et al., 2017;  
75 Terrado et al., 2009; Zhang et al., 2015). Strong seasonality has been revealed through  
76 the annual data of 18S rDNA derived from arctic surface water samples, with  
77 dominant microbial eukaryotic groups being largely different between summer and  
78 winter (Marquardt et al., 2016). Composition of the microbial eukaryotic community  
79 in the Arctic Ocean is also shown to vary across water masses and environments with  
80 different physicochemical parameters and nutrient concentrations (Hamilton et al.,  
81 2008; Joli et al., 2018; Kiliyas et al., 2014; Thaler & Lovejoy, 2013). These results

82 collectively suggest the importance of environmental conditions in constructing  
83 microeukaryotes at large time and spatial scales.

84       Apart from the physicochemical properties, viruses are thought to be a key  
85 effector of the communities of their microbial hosts in marine ecosystems (Middelboe  
86 & Brussaard, 2017; Rohwer & Thurber, 2009; Suttle, 2007). *Imitervirales*, belonging  
87 to the phylum *Nucleocytoviricota* (also known as nucleocytoplasmic large DNA  
88 viruses, NCLDVs) (Iyer et al., 2006), is one of the most dominant orders of viruses  
89 infecting diverse microbial eukaryotes in the ocean (Endo et al., 2020). A previous  
90 study showed a tight association between the community of NCLDVs and that of  
91 microbial eukaryotes based on a global metagenomic dataset (Endo et al., 2020).  
92 However, as the result was based on a global scale dataset, the observed association  
93 was expected from substantial differences in the host eukaryotes inhabiting  
94 geographically distant and environmentally distinct locations. We consider that  
95 investigating such virus-host associations at a smaller geographic and time scales  
96 would provide further insights into the possible regulatory role of viruses on the host  
97 community structure. However, such local studies are currently scarce for  
98 *Imitervirales* (or NCLDVs) (Clerissi et al., 2012; Sandaa et al., 2018), and to our  
99 knowledge, there is no study investigating both *Imitervirales* and eukaryotic  
100 communities in the Arctic Ocean. We reasoned that examining whether the two  
101 communities are associated with each other or not in geographically close locations  
102 with similar environmental conditions and in the same period would lead to a better

103 understanding of the interactions between *Imitervirales* and microbial eukaryotes. If  
104 virions persistently remain in an environment for a long period of time, then we  
105 would not expect a strong association between *Imitervirales* and microbial eukaryotes.  
106 In contrast, if viruses actively infect various eukaryotes, then a strong eukaryote-viral  
107 association would emerge.

108 In this study, we conducted a high spatial resolution sampling of microbial DNA  
109 from the surface water during the 2018 cruise of the Korean ice breaking research  
110 vessel (IBRV) Araon. We investigated the community structures of microeukaryotes  
111 and *Imitervirales* in the basin region of the Chukchi Sea (the northeastern Chukchi  
112 Sea; hereafter NECS) as well as in an adjacent sea (AS) outside the Beaufort Gyre  
113 and melt ponds. The surface water of the NECS is characterized by the low salinity  
114 and nutrients under the influence of the Beaufort Gyre system, making it distinct from  
115 the AS areas. To gain insight into the interdependence of the eukaryotic and  
116 *Imitervirales* communities, we analyzed the statistical relationships between the  
117 eukaryotic and *Imitervirales* communities while controlling the effects of  
118 environmental and geographical characteristics in the two different environmental  
119 regimes (the “stable” NECS and the “dynamic” AS).

120

## 121 **Results**

### 122 **Water characteristics and environmental factors**

123 Twenty-one oceanic sampling stations (surface seawater samples) were classified into  
124 two groups depending on the geographical locations and the temperature-salinity (TS)  
125 diagram: the NECS (in the regions of Chukchi Plateau and Canada basin) and the AS  
126 (Figs 1 and S2).

127 Of the measured physical parameters (Supplement Table S1), temperature  
128 showed little difference among stations, but salinity showed relatively large  
129 differences (Supplement Table S1, Fig. 2A and B). Sea surface temperatures (SST) in  
130 the NECS ( $-0.99^{\circ}\text{C}$  on average) was slightly higher than those in the AS ( $-1.11^{\circ}\text{C}$  on  
131 average), and the salinity in the NECS (27.98 psu on average) was substantially lower  
132 than the AS (30.05 psu on average). Sea ice coverage in each station was 0% to  
133 89.5% (Supplement Table S1).

134 Concentrations of nutrients (ammonia nitrogen, nitrate+nitrite, phosphate, and  
135 silicate) as well as Chl *a* were measured for each location. Most of the sampled area  
136 was oligotrophic, while water conditions of three “bloom” sites (stations A13, A14,  
137 A15) in the AS presented high nutrient concentrations. The nutrient and Chl *a*  
138 concentrations for the bloom stations (on average: nitrate + nitrite:  $1.17\ \mu\text{mol}\cdot\text{L}^{-1}$ ;  
139 phosphate:  $1.02\ \mu\text{mol}\cdot\text{L}^{-1}$ ; silicate:  $14.15\ \mu\text{mol}\cdot\text{L}^{-1}$ ; chlorophyll *a*:  $7.23\ \text{mg}\cdot\text{m}^{-3}$ ) were  
140 much higher than those in other stations (on average: nitrate+nitrite:  $0.14\ \mu\text{mol}\cdot\text{L}^{-1}$ ;  
141 phosphate:  $0.52\ \mu\text{mol}\cdot\text{L}^{-1}$ ; silicate:  $0.01\ \mu\text{mol}\cdot\text{L}^{-1}$ ; chlorophyll *a*:  $0.17\ \text{mg}\cdot\text{m}^{-3}$ ).  
142 Ammonia concentration was relatively high at the station A13 ( $0.11\ \mu\text{mol}\cdot\text{L}^{-1}$ ), while  
143 it was less than  $0.02\ \mu\text{mol}\cdot\text{L}^{-1}$  in other stations.

144

#### 145 **Amplicon sequences**

146 Sequence information and the number of ASVs were summarized in Supplement  
147 Table S2. The number of ASVs from each sample before subsampling is provided in  
148 Fig. S1. For the 3-144  $\mu\text{m}$  eukaryotic community, 45,588 to 214,775 reads obtained  
149 from individual samples were subsampled at the minimum number of reads across  
150 different samples (i.e., 45,588 reads), and then grouped into 107 to 390 eukaryotic  
151 18S non-singleton ASVs with the mean proportion of raw read usage being 37%. For  
152 the 0.2-3  $\mu\text{m}$  eukaryotic community, subsampling was performed at 72,359 reads,  
153 which was grouped into 106 to 385 eukaryotic 18S ASVs. For the *Imitervirales*  
154 community, subsampling was also performed at 26,638 reads, which generated 244 to  
155 525 *Imitervirales polB* ASVs per sample.

156

#### 157 **Composition and local diversity of eukaryotic and *Imitervirales* communities**

158 We first investigated eukaryotic communities by excluding sequences from metazoa  
159 and fungi, because they have different lifestyles and ecological functions from protists.  
160 The community compositions were different between large (3-144  $\mu\text{m}$ ) and small  
161 (0.2-3  $\mu\text{m}$ ) size-fractions (Fig. 3A and B). Eukaryotic communities of the large size  
162 fraction were dominated by dinoflagellates (36.6% on average), diatoms (11.4%) and  
163 other marine alveolates (29.7%, include ciliates and protaveolata), while those of  
164 small size fraction were dominated by ciliates (28.5%), chlorophytes (19.8%) and



165 picozoa (10.8%). In the large size fractions, lower proportion of dinoflagellates  
166 occurred in the AS sites than in the NECS sites (ANOVA followed by Tukey post hoc  
167 tests,  $p < 0.01$ ), especially in the three bloom samples (ANOVA followed by Tukey  
168 post hoc tests,  $p < 0.05$ ). On the contrary, diatoms tended to be more abundant in the  
169 AS sites than in the NECS sites (ANOVA followed by Tukey post hoc tests,  $p < 0.01$ ).  
170 In the small size fraction, although the dominant ciliates had little difference among  
171 all the samples, chlorophytes showed higher proportion in the AS bloom samples and  
172 the NECS samples than in other samples of the AS sites (ANOVA followed by Tukey  
173 post hoc tests,  $p < 0.01$ ). Another unique feature of the bloom sites was that there was  
174 almost no picozoa sequences in these samples, while the picozoa represented one of  
175 the abundant phyla in the other samples.

176 As for metazoa and fungal communities (Fig. S3), copepods were the most  
177 dominant (20.0% on average) in the 3-144  $\mu\text{m}$  size fraction samples. As for protist  
178 community, the most abundant ASVs ( $>10\%$  in at least one sample) in the large size  
179 fraction belonged to *Heterocapsa* (dinoflagellate), *Chytriodinium* (dinoflagellate),  
180 *Gyrodinium* (dinoflagellate), while those in the small size fraction were *Micromonas*  
181 (chlorophyte), *Oligotrichia* (ciliate), *Chytriodinium* (dinoflagellate), *Phaeocystis*  
182 (haptophyte), *Chaetoceros* (diatom) and *Carteria* (chlorophyte).

183 *Imitervirales* ASVs were mapped onto a larger set of *polB* sequences from the  
184 *Tara* Oceans dataset and classified into 13 clades (Fig. S5). Clades 7 (28.6%) was the  
185 most abundant clade, followed by clade 6 (20.2%) and clade 2 (17.0%) (Fig. 3C). In

186 the bloom sites, particularly high relative abundances were shown for clade 5 and 6.  
187 In the other AS sites, clade 3 which includes the OLPVs (Organic Lake  
188 Phycodnavirus 1 and 2) showed higher proportions than in the NECS. In the NECS  
189 samples, clade 2 showed high proportions (28.0% on average). Clear difference was  
190 found between the communities in the two aquatic habitats (sea water and melt pond  
191 water) for the eukaryotic and *Imitervirales* communities (Fig. 3A–C and S6).  
192 *Imitervirales* communities in the Arctic Ocean were clearly distinguished with those  
193 obtained from subtropical coastal sea water and hot spring samples by the same  
194 amplicon method (Fig. S6) (Li et al., 2019; Proding et al., 2020; Proding et al.,  
195 unpublished). In the samples of the present study, *Imitervirales* communities were  
196 classified into three groups: Arctic seawater, Arctic algae bloom related seawater and  
197 melt pond water (Fig. S6). The sites in the NECS and AS shared 702 common  
198 *Imitervirales* ASVs, while 357 and 871 unique ASVs were detected in the NECS and  
199 AS sites, respectively (Fig. S7A). It was also shown that 515 *Imitervirales* ASVs were  
200 shared between the bloom sites (A13, A14 and A15) and non-bloom sites (Fig. S7B),  
201 while 319 and 1,096 ASVs were unique to the bloom sites and non-bloom sites,  
202 respectively.

203 Shannon's diversity index was calculated for each community (Fig. S4).  
204 Diversity of eukaryotic communities in the large size fraction showed the same  
205 variation trend as those in the small fraction among different samples. The three  
206 bloom sites in the AS had statistically lower diversity than others in both the large

207 (ANOVA followed by Tukey post hoc tests,  $p < 0.01$ ) and small eukaryotic  
208 communities (ANOVA followed by Tukey post hoc tests,  $p < 0.01$ ). The bloom sites  
209 had higher diversity of *Imitervirales* (4.34) than other sites (3.83) on average,  
210 although it was not statistically significant (ANOVA,  $p = 0.068$ ) (Fig. S4D).

211

### 212 **Correlations with eukaryotic 18S community**

213 Result of dbRDA (Fig. 4) and Spearman's rank correlation (Supplement Table  
214 S5) demonstrated that salinity and longitude were the two most significant variables  
215 in predicting the Chl *a* biomass. The Chl *a* concentration also showed positive  
216 correlations with phosphate and silicate (phosphate:  $R = 0.73$ ,  $p < 0.01$ ; silicate:  $R =$   
217  $0.598$ ,  $p < 0.01$ ). Current velocity had no measurable influence on community  
218 variation in different waters ( $p > 0.3$ ). Eukaryotic as well as *Imitervirales*  
219 communities in the AS and NECS were well separated from each other in a similar  
220 way as geographic distribution and TS diagram showed (Fig. S2).

221 According to the Mantel and partial Mantel tests, eukaryotic communities in both  
222 the large (3-144  $\mu\text{m}$ ) and small (0.2-3  $\mu\text{m}$ ) size fractions correlated significantly with  
223 *Imitervirales* communities in both the NECS and AS sites, even when the potential  
224 effects of spatial and environmental autocorrelations were removed ( $q < 0.05$ ) (Table  
225 1). Geographical distance was also a significant factor explaining the eukaryotic  
226 communities in the small fraction ( $q < 0.05$ ), although no significant correlation was  
227 found for the large size fraction. For both the size fractions, environmental factors

228 were significant explanatory variables for the eukaryotic communities among the AS  
229 sites, whereas no correlation was detected between environmental factors and  
230 eukaryotic communities in the NECS sites. The Mantel test was also performed on the  
231 eukaryotic 18S communities and each environmental factor (Table S7 and S8). All the  
232 environmental factors in the NECS sites were not significantly correlated with the  
233 eukaryotic 18S communities in the two size-fractions. In the AS sites, only phosphate  
234 and silicate were significantly correlated with the eukaryotic 18S communities.

235

## 236 **Discussion**

### 237 **Basic environmental parameters and phytoplankton biomass**

238 Oligotrophy is one of the common features of surface sea water in the NECS.  
239 Annual data (2008 to 2010) near the NECS indicated that concentration of nitrate plus  
240 nitrite in surface sea water of the study area were mostly depleted in the summer with  
241 the values between 0.01 and 0.1  $\mu\text{mol}\cdot\text{L}^{-1}$  (Fujiwara et al., 2014). In our study,  
242 concentrations of nitrate plus nitrite also showed low values ( $\leq 0.14 \mu\text{mol}\cdot\text{L}^{-1}$ ) except  
243 for some bloom samples in the AS (0.27–3.12  $\mu\text{mol}\cdot\text{L}^{-1}$ ) (Supplement Table S1). The  
244 Chl *a* concentration, which is a proxy of phytoplankton biomass, was also low at the  
245 nutrient-depleted stations (0.02–1.70  $\text{mg}\cdot\text{m}^{-3}$ ) (Supplement Table S1), suggesting the  
246 growth of phytoplankton was limited by nutrient availability (Ko et al., 2020). These  
247 values were also consistent with recent Chl *a* data at the corresponding area obtained  
248 from satellite ( $< 0.4 \text{mg}\cdot\text{m}^{-3}$ ) (Lee et al., 2019).

249 We separated the seawater sampling sites into two groups, NECS and AS, based  
250 on the geographical locations. The grouping was also supported by the TS diagram in  
251 which the NECS sites were characterized by lower salinity (Fig. S2). The Beaufort  
252 Gyre, which influences water properties in the NECS, is the greatest freshwater  
253 reservoir in the Arctic (Proshutinsky et al., 2019). On the other hands, samples having  
254 higher salinity were classified into the AS, because these locations would be more  
255 influenced by oceanic water masses and current regimes including the Pacific Water  
256 from the south and Atlantic Water from the west (Jones, 2001; Woodgate, 2013). It is  
257 also showed that the main reason of an increase of salinity and nutrient concentrations  
258 (resulting from summer algal blooms) in the oligotrophic northeastern Chukchi Sea  
259 surface water should be the intrusion of Atlantic cold saline water (Jung et al., 2021).

260

### 261 **Community structures of microbial eukaryotes and *Imitervirales***

262 The eukaryotic communities were generally dominated by dinoflagellates,  
263 diatoms and other alveolates in the large size fraction (3-144  $\mu\text{m}$ ) and by ciliates and  
264 chlorophytes in the small size fraction (0.2–3  $\mu\text{m}$ ) (Fig. 3A and B). The dominance of  
265 these groups was roughly consistent with the previous studies that examined the  
266 microbial eukaryotic community structures in the Arctic Ocean by the molecular  
267 techniques (Comeau et al., 2011; Lovejoy et al., 2006; Marquardt et al., 2016; Onda et  
268 al., 2017; Xu et al., 2020) and the satellite ocean color remote sensing (Fujiwara et al.,  
269 2014; Lee et al., 2019). Diagnostic pigment signatures have indicated that

270 prasinophytes (Chlorophyta) were the dominant phytoplankton group in the northern  
271 Chukchi Sea, while diatoms and dinoflagellates were dominant in the southern  
272 Chukchi Sea (Fujiwara et al., 2014). Diatoms and chlorophytes are the common  
273 components of spring bloom in the Arctic Ocean (Von Quillfeldt, 2000). In our study,  
274 the phytoplankton communities in the bloom sites were dominated by unclassified  
275 marine alveolates (45.9% relative abundance) and diatoms (13.5%) in larger size  
276 fraction (Fig. 3A). The representative sequence of the unclassified marine alveolate  
277 ASV was best hit to the dinoflagellate *Heterocapsa rotundata* in the NCBI Reference  
278 RNA sequences database (2021/7/7 updated) (100% sequence similarity). Although  
279 this dinoflagellate species has been detected typically in the temperate estuaries  
280 (Kyeong et al., 2006; Millette et al., 2015), it was also found to be common near the  
281 study area by using microscopic technique (Ardyna et al., 2017).

282 Unanticipatedly high proportion of metazoan sequences were found in 3-144  $\mu\text{m}$   
283 eukaryotic group (Fig. S3). Most of them belong to copepods, which are predominant  
284 zooplankton in the Arctic Ocean (Kosobokova et al., 2011; Wang et al., 2019).  
285 However, body sizes of adult free-living copepods are usually above 200  $\mu\text{m}$ , which  
286 cannot pass through the pre-filtration mesh. Although some of the copepod species  
287 (e.g., *Sphaeronellopsis monothrix*, 110  $\mu\text{m}$ ) are even smaller, they are the parasite of  
288 marine ostracods (Bowman & Kornicker, 1967). It is reported that smaller eggs of  
289 copepods are produced by the adults in spring and summer, and some of these may be  
290 float to the surface layer (Hirche & Niehoff, 1996). Thus, one possible explanation for

291 the dominance of metazoan sequences is the emergence of the larvae/eggs in the  
292 seawater.

293 We detected significant differences in the eukaryotic community between the  
294 NECS and AS for both size fractions by the dbRDA analysis (ANOSIM,  $p < 0.01$ )  
295 (Fig. 4A and B). In the large size fraction, communities of the NECS sites were  
296 consistently dominated by dinoflagellates, whereas the relative abundance of  
297 dinoflagellates tended to be lower at the AS sites (Fig. 3A). In the small size fraction  
298 (Fig. 3B), community difference between two sampling regimes was not obvious at  
299 the phylum level, despite a clear separation by the dbRDA (Fig. 4B). These results  
300 suggest that distinct ecosystem structures between the NECS and AS is likely caused  
301 by the current systems and associated physicochemical characteristics. We also  
302 evaluated eukaryotic communities from the two melt ponds on sea ices, which were  
303 located nearby the two northernmost seawater sites (Fig. 3C). The communities were  
304 largely distinct from the seawater communities, most likely reflecting the difference  
305 in salinity between freshwater and seawater (Xu et al., 2020).

306 Besides eukaryotes, *Imitervirales* communities were analyzed in our study (Fig.  
307 3C). Among *Imitervirales*, clades 2, 6, and 7 were abundant lineages at most of the  
308 sampling sites (Figs 3C and S5). Intriguingly, these three dominant clades do not  
309 include any reference species of *Imitervirales*. A previous study reported that the  
310 Arctic Ocean is a hot spot of the endemic NCLDV's including *Imitervirales* (Endo et  
311 al., 2020); the dominant phylotypes detected in our study may support the high

312 uniqueness of *Imitervirales* phylotypes in the study area. It is suggested that the  
313 geographical distribution of viruses follow those of the host species (Ibarbalz et al.,  
314 2019), the endemic feature is partly derived from the uniqueness of host eukaryotic  
315 species. Community compositions of *Imitervirales* were also differentiated between  
316 the NECS and AS stations by dbRDA analysis, as with the eukaryotic communities  
317 (Fig. 4C). Expectedly, NMDS analysis (Fig. S6) clearly separated the *Imitervirales*  
318 communities in the Arctic sites from those collected from coastal seawater and a hot  
319 spring in Japan, which were evaluated using the same MEGAPRIMER method. This  
320 separation would be due to the difference in host communities which are primarily  
321 determined by the environmental conditions.

322

### 323 **Loose association between environmental variables and eukaryotic community**

324 In this study, salinity was the primary factor used for dividing the sites between  
325 the NECS and AS (Fig. S2). Eukaryotic communities were also clearly separated  
326 between the NECS and AS (Fig. 4A and B), indicating that the compositions of  
327 eukaryotes were strongly influenced by the physical factors in the study area. Thus,  
328 we separately assessed the relationship between eukaryotic community and  
329 environmental variables or *Imitervirales* community for the NECS and AS to  
330 eliminate possible autocorrelation caused by the difference of eukaryotic communities  
331 among different water regimes.



332 In the AS sites, eukaryotic community was strongly correlated with  
333 environmental factor, but less correlated with geographical distance (Table 1). This  
334 suggests that the community was more affected by physicochemical environmental  
335 properties rather than dispersal events such as lateral advection among these sites. In  
336 fact, only the phosphate and silicate were significantly correlated with eukaryotic  
337 communities in the AS sites (Table S7 and S8). On the other hand, environmental  
338 factors (Table 1, S6, S7 and S8) did not show any association with eukaryotic  
339 communities in the NECS sites, whereas the effect of geographical distance was  
340 comparable to that detected in the AS sites. This indicates that other factors may be  
341 more important in making up the eukaryotic communities in the Beaufort Sea basin.  
342 In our study, all the sampling sites in the NECS were oligotrophic, and in some  
343 locations, the concentrations of nutrients were below the detection limit. Additionally,  
344 although temperature and salinity tend to be the key factors for microbial eukaryotic  
345 community structure and distribution in marine ecosystem (Caron et al., 2016; Sherr  
346 et al., 2007), these variables did not largely vary among the NECS sites. The low  
347 variation in environmental condition may cause the lack of correlation between  
348 environmental variables and the eukaryotic community.

349

### 350 **Tight association between *Imitervirales* and the microbial eukaryotic community**

351 In contrast to environmental variables, *Imitervirales* communities were  
352 consistently correlated with eukaryotic communities in both the NECS and AS

353 regions (Table 1). Notably, the correlation coefficients were rarely influenced by the  
354 geographical and environmental factors, suggesting that *Imitervirales* were associated  
355 with the eukaryotes in both types of water independently from environmental factors.  
356 This trend was most pronounced at the stations in the NECS, where environmental  
357 variables were relatively stable and had no correlation with eukaryotic community  
358 variations. Our results support the idea that the communities of *Imitervirales* and  
359 eukaryotes are actively interacting and co-varying without detectable influence from  
360 the environmental conditions even in oligotrophic and homogeneous environments.

361 It has been suggested that biological interactions, such as predator-prey and  
362 symbiotic interactions, are responsible to determine community structure and the  
363 dynamics of microbes (Chaffron et al., 2020; Lima-Mendez et al., 2015). Additionally,  
364 viruses have been proposed as a key factor influencing the protist communities as  
365 they can impose top-down controls on their specific host populations (Brussaard et al.,  
366 1996; Nagasaki et al., 1994). Recent studies using Mantel statistics or co-occurrence  
367 network analysis indicated that *Imitervirales* are tightly associated with a variety of  
368 protist lineages at a global level (Endo et al., 2020; Meng et al., 2021), although only  
369 little of them have been isolated (Mihara et al., 2018). Our 18S rDNA barcoding  
370 revealed that chlorophytes and haptophytes, both of which are known host lineages of  
371 *Imitervirales*, were major protists in the small size fraction. Although the dominating  
372 clades in the large-sized eukaryotic communities such as dinoflagellates, ciliophora,  
373 and diatoms have not yet been reported as host lineages, these groups were predicted

374 to be the most closely linked host group for *Imitervirales* from a global scale network  
375 analysis (Meng et al., 2021). Considering the highest proportion of *Imitervirales*  
376 among NCLDV's in the global ocean and their potential role as a top-down factor on  
377 host populations, relative compositions of the host lineages may well result from the  
378 combination of a variety of specific infections of NCLDV's and other viruses.

379 In the Arctic Ocean, an increase in sea surface temperature and decrease in sea  
380 ice cover are progressing (Peng et al., 2020; Praetorius et al., 2018). These climate  
381 change has been shown to be associated with the shift of eukaryotic community  
382 structure as well as the increase of biomass and the potential loss of biodiversity in the  
383 past decade (Arrigo & van Dijken, 2015; Li et al., 2009; Majaneva et al., 2012),  
384 although another study suggests a decreasing tendency on biomass (Hill et al., 2013).  
385 Increased temperature may provide competitive advantage to small  
386 nanophytoplankton over larger phytoplankton, resulted in an increase of the  
387 contribution of small phytoplankton in the community (Hare et al., 2007; Li et al.,  
388 2009). Our study showed that the association with *Imitervirales* community was  
389 generally higher for the small-sized plankton community than for the large-sized  
390 community, implying the role of *Imitervirales* in structuring the eukaryotic  
391 community in the study area may become increasingly important in a future. However,  
392 it should be noted that virus-host interactions can be influenced by the environments,  
393 especially temperature (Demory et al., 2017, 2021).

394

395 **Experimental procedures**

396 **Sampling sites and processes**

397 During the Arctic Ocean Cruise of the IBRV Araon 2018 of Korean Polar Research  
398 Institute (KOPRI), surface water samples were collected (SBE32 carousel water  
399 sampler) at 21 stations from 6th to 22nd of August 2018. Environmental parameters  
400 including salinity, temperature, Chl *a* and nutrient concentration were obtained in  
401 parallel. Salinity and temperature were measured by the CTD sensors in situ  
402 measurement of seawater. For Chl *a*, seawater samples were collected in the upper  
403 100 m depth and filtered through 47 mm GF/F filters, then was extracted with 90%  
404 acetone (Jung et al., 2021). Chl *a* was measured by fluorometer (Trilogy, Turner  
405 Designs, USA) (Lee et al., 2016). For nutrient concentration measurement, 50 ml  
406 seawater sample for each site was collected by conical tube, stored at 4°C. Nitrite,  
407 nitrate, ammonia, phosphate, and silicate were measured using a four-channel  
408 continuous auto-analyzer (QuAAtro, Seal Analytical) followed the Joint Global  
409 Ocean Flux Study (JGOFS) protocols (Gordon et al., 1993). Nutrient concentrations  
410 under detection limit and lower than 0.005  $\mu\text{mol}\cdot\text{L}^{-1}$  were considered 0.

411 Seawater (1 L) for the DNA analysis was collected from 2 m depth with  
412 Niskin-bottles attached to a CTD–CMS system for all stations except at two closed  
413 melt ponds (500 mL), where water samples were collected just below the surface by  
414 bucket. Collected seawater was prefiltered with a 144  $\mu\text{m}$  pore-size mesh to remove  
415 large particles (prewashed with ultrapure water). Two liters of water were separated

416 into two replicates on average, then were filtered through 3  $\mu\text{m}$  Millipore membrane  
417 filter by air pump ( $< 0.03\text{MPa}$ ) for larger size fraction, further filtered through 0.2  $\mu\text{m}$   
418 Millipore membrane filter with the same method for smaller sized fraction. The  
419 membrane filters were transfer to 1.5 mL microtubes and then stored in  $-20^{\circ}\text{C}$  on  
420 board and then transferred to the laboratory while continuously kept at  $-20^{\circ}\text{C}$ .

421

#### 422 **DNA extraction and purification**

423 DNA extraction and purification were performed following (Endo et al., 2013; Endo  
424 et al., 2018). Briefly, each membrane filter was thawed at room temperature and was  
425 put into the 1.5 mL microtubes with glass beads and XS buffer. The cells on filter  
426 were crushed with a beads beater and the mixture was incubated at  $70^{\circ}\text{C}$  for 60 min.  
427 Glass beads were removed from mixture after centrifugation. 600  $\mu\text{L}$  isopropanol  
428 were added to the supernatant and mixed. The precipitated DNA was purified with  
429 NucleoSpin gDNA Clean-up Kit (Macherey-Nagel). Finally, the purified DNA was  
430 dissolved in low TE buffer and stored at  $-20^{\circ}\text{C}$ .

431

#### 432 **Eukaryotic 18S gene amplification and purification**

433 Eukaryotic 18S rRNA gene V4 region fragments were amplified from extracted DNA  
434 of both 3  $\mu\text{m}$  and 0.2  $\mu\text{m}$  size fractions using primer E572F  
435 (5'-CYGCGGTAATTCCAGCTC-3') and E1009R  
436 (5'-AYGGTATCTRATCRTCCTTYG-3') (Comeau et al., 2011) with attached Illumina

437 MiSeq 300 PE overhang reverse adapters as described in Illumina metagenomic  
438 sequencing library preparation protocols.

439 12.5  $\mu\text{L}$  2x KAPA HiFi HotStart ReadyMix was mixed with 5  $\mu\text{L}$  1  $\mu\text{mol}\cdot\text{L}^{-1}$   
440 amplicon PCR forward primer, 5  $\mu\text{L}$  1  $\mu\text{mol}\cdot\text{L}^{-1}$  amplicon PCR reverse primer and 2.5  
441  $\mu\text{L}$  diluted DNA samples (0.25  $\text{ng}\cdot\mu\text{l}^{-1}$ ), and were added into a PCR tube (final  
442 volume 25  $\mu\text{L}$ ). The amplification was performed for each sample with the following  
443 temperature cycling condition: initial denaturation at 98°C for 30 sec was followed  
444 by 30 cycles of denaturation at 98°C for 10 sec, annealing at 55°C for 30 sec and  
445 72°C for 30 sec. A final extension step was at 72°C for 5 min.

446 Amplicons were purified with magnetic beads (Agencourt AMPure XP beads,  
447 Beckman Coulter, Inc.). The purified DNA were dissolved in 25  $\mu\text{L}$  ultrapure water  
448 and stored at -20°C.

449

#### 450 ***Imitervirales polB* gene amplification and purification**

451 The degenerated 82 *polB* primer pairs (MEGAPRIMER, Supplement Table S3) were  
452 used to amplify the *polB* gene of *Imitervirales* from 0.2  $\mu\text{m}$  membrane filter DNA  
453 samples (Li et al., 2018). A previously optimized amplification method named  
454 “MP10” (Supplement Table S4) was performed. amplification protocol, materials and  
455 temperature cycling condition were the same as a previous work (Prodinger et al.,  
456 2020).

457 After amplification, we merged all the eight amplicons generated from the same  
458 DNA sample using ethanol precipitation (Prodinger et al., 2020). Finally, the DNA  
459 precipitation was air dried for around 10 min and resuspended in 25  $\mu$ L ultrapure  
460 water. Gel extraction was performed to remove unspecific amplification products. Gel  
461 electrophoresis was made by 2% agarose gel. The gel was then stained in 5000x  
462 diluted SYBR gold buffer for 12 min. 400-500 bp visible bands were cut from the gel.  
463 The Promega's Wizard SV Gel and PCR Clean-Up System was used to perform gel  
464 extraction according to the marker's protocol. DNA was dissolved in 25  $\mu$ L ultrapure  
465 water, stored at  $-20^{\circ}\text{C}$ .

466

#### 467 **Index PCR, library construction and sequencing**

468 Index PCR was performed following the Illumina Miseq platform protocol. Produced  
469 amplicons of 3-144  $\mu$ m eukaryotes and *Imitervirales* were purified with the magnetic  
470 beads (Agencourt AMPure XP beads, Beckman Coulter, Inc.). Final DNA production  
471 was dissolved in 27.5  $\mu$ L ultrapure water, stored at  $-20^{\circ}\text{C}$  less than 24h. Produced  
472 amplicons of 0.2-3  $\mu$ m eukaryotes were purified by gel, performed by Macrogen Corp.  
473 Japan.

474 DNA concentration was measured by Qubit HS (high-sensitive) kit. Library was  
475 denatured following the standard MiSeq normalization method provided by Illumina.  
476 The MiSeq Reagent Kit v2 and NaOH were used for the library with final DNA  
477 concentration of 2 nM. Paired-end sequencing was performed on the MiSeq platform.

478

479 **Sequence processing and bioinformatic analysis**

480 Eukaryotic 18S sequences are processed with QIIME2 (version: 2019.10) (Bolyen et  
481 al., 2019). 260 bp of left pair reads and 220 bp of right pair reads were trimmed.  
482 DADA2 was used to cut primer sequences, merging the paired end reads, performing  
483 quality control, dereplication, chimera check, and Amplicon Sequence Variants  
484 (ASVs) generation (Callahan et al., 2016; Knight et al., 2018). Singleton ASVs were  
485 removed. Taxonomic annotation was done with QIIME2's vsearch (Rognes et al.,  
486 2016) plugin and the SILVA 132 small subunit with 97% similarity database (Quast  
487 et al., 2013) at 97% identity for species eukaryotic 18S datasets. Dominant ASVs  
488 (reads percentage over 0.50% of each size fraction) were again searched by blastn  
489 (Altschul et al., 1990) in NCBI Reference RNA sequences dataset, result include  
490 detailed lineage information with highest identity value was selected.

491 For the *Imitervirales* sequences, MAPS2 (*Mimiviridae* Amplicon Processing  
492 System) was used for sequence analysis (Prodinger et al., unpublished). DADA2 was  
493 used to check and remove megaprimer sequences, merging, quality control,  
494 dereplication, chimera check, and non-singleton ASV output. The ASVs were aligned  
495 against *Imitervirales polB* amino acid sequence database (Li et al., 2018). Nucleotide  
496 sequences were translated into amino acid sequences and then added to reference  
497 alignment using mafft (version: 7.453, parameters: --thread -1 --genafpair  
498 --maxiterate 1000) (Katoh et al., 2002; Katoh & Standley, 2013). Sequences which



499 were assigned to the *Imitervirales* were saved for the further analysis, while other  
500 sequences were removed. Translated ASVs were placed into the reference  
501 phylogenetic tree built by the *polB* sequences from *Tara* Ocean dataset (Endo et al.,  
502 2020) by pplacer (version: 1.1. alpha19) (Matsen et al., 2010). Thirteen *Imitervirales*  
503 clades were manually defined in the tree, and ASVs were assigned to each clade.  
504 Phylogenetic tree was edit and output by iTOL v5.7 (Letunic & Bork, 2019).

505

### 506 **Ecological analysis**

507 Community composition was evaluated based on number of reads of each ASV in  
508 every sample. ASVs were then subsampled by the rarefy function (“vegan” package)  
509 (Oksanen et al., 2018) in R (version 3.6.3). Relative abundance was represented by  
510 the rate of each ASV reads percentage in each sample. Shannon diversity index of  
511 eukaryotic and *Imitervirales* community was calculated by R (“vegan” package)  
512 based on the subsampled ASV table. ANOVA and Tukey post hoc tests were  
513 performed by R (“agricolae” package). Composition bar chart and diversity bar chart  
514 with error bars of standard deviation were calculated with Microsoft Excel (version  
515 16.41). The map of sampling stations, temperature-salinity (TS) diagram and heatmap  
516 of environmental factors and Shannon diversity were generated by Ocean Data View  
517 (ODV, version 5.1.5) (Schlitzer, R., Ocean Data View, <https://odv.awi.de>, 2018).  
518 Biological correlation was performed by dbRDA (distance-based redundancy  
519 analysis) function (Legendre & Andersson, 1999), using R (“vegan” package) based

520 on Bray-Curtis dissimilarity. For dbRDA ordination, ASV composition was  
521 normalized by Hellinger transformation by decostand function. Spearman's rank  
522 correlation was performed by R (cor.test function) and  $p$  value was also calculated by  
523 R (cor.test function). ANOSIM with 9,999 permutation was performed for biological  
524 data grouping test. Results of dbRDA were plotted by "ggord" with 95% confidence  
525 interval circle contained samples in different water types. Non-metric  
526 multidimensional scaling (NMDS) analysis of *Imitervirales* community was  
527 performed by R (monoMDS function) based on Bray-Curtis dissimilarity matrix made  
528 with the subsampled ASV table.

529 Mantel test and partial Mantel test (Mantel, 1967; Smouse et al., 1986) based on  
530 Pearson correlation coefficient were performed for calculating the correlation among  
531 geographic distance, environmental variables (i.e., a distance matrix combining  
532 temperature, salinity, dissolved inorganic nitrogen (DIN, nitrate + nitrite + ammonium  
533 nitrogen), phosphate, and silicate), eukaryotic community and *Imitervirales*  
534 community, using R ("ade4" package) (Bougeard & Dray, 2018) with permutations of  
535 1,000. Geographic distance between each sampling station was calculated with R  
536 ("geosphere" package) from latitude and longitude data. Every environmental variable  
537 was normalized by  $\log_{10}(x+1)$  function ( $x$ : the value of environmental factor).  
538 Euclidean distance of environmental factors and Bray-Curtis dissimilarity of  
539 subsampled relative abundances of eukaryotes and *Imitervirales* between sampling

540 sites were calculated with R. All  $p$  values were adjusted by the Holm's method (Holm,  
541 1979) using R's `p.adjust` function.

542

#### 543 **Data availability**

544 The raw reads generated in this study were uploaded to SRA (Sequence Read  
545 Archive) database on NCBI website. The accession numbers are from SRR12981736  
546 to SRR12981758 under project ID PRJNA674408 (3-144  $\mu\text{m}$  eukaryotic 18S), from  
547 SRR12981654 to SRR12981676 under project ID PRJNA674418 (0.2-3  $\mu\text{m}$   
548 eukaryotic 18S) and from SRR12981759 to SRR12981780 under project ID  
549 PRJNA674422 (0.2-3  $\mu\text{m}$  *Imitervirales polB*).

550

#### 551 **Acknowledgments**

552 We would like to thank colleagues from Korea Polar Research Institute for the help of  
553 sampling and physicochemical parameter determination; Tatsuhiro Isozaki, Kento  
554 Tominaga and Hiroaki Takebe from Laboratory of Marine Microbiology, Kyoto  
555 University, for helping with DNA sequencing and support of experiment. We also  
556 thank the captain and crew of the IBRV Araon Cruise for their support during the  
557 cruise. This work was supported by JSPS/KAKENHI (Nos. 18H02279 and 19H05667  
558 to H.O., 17H03850 to T.Y. and H.O., and Nos. 19K15895 and 19H04263 to H.E.),  
559 and Scientific Research on Innovative Areas from the Ministry of Education, Culture,  
560 Science, Sports and Technology (MEXT) of Japan (Nos. 16H06429, 16K21723, and

561 16H06437 to H.O.). This research was also supported by the project  
562 titled 'Korea-Arctic Ocean Warming and Response of Ecosystem (K-AWARE,  
563 KOPRI, 1525011760)', funded by the Ministry of Oceans and Fisheries, Korea (KHC,  
564 JJ, EJY, SHK). Computational work was completed at the SuperComputer System,  
565 Institute for Chemical Research, Kyoto University. The authors declare no conflicts of  
566 interest.

567

568 **References**

- 569 Altschul, S. F., Gish, W., Miller, W., Myers, E. W., & Lipman, D. J. (1990). Basic  
570 local alignment search tool. *Journal of Molecular Biology*, 215(3), 403–410.
- 571 Ardyna, M., Babin, M., Devred, E., Forest, A., Gosselin, M., Raimbault, P., &  
572 Tremblay, J. (2017). Shelf-basin gradients shape ecological phytoplankton  
573 niches and community composition in the coastal Arctic Ocean (Beaufort Sea).  
574 *Limnology and Oceanography*, 62(5), 2113–2132.
- 575 Arrigo, K. R., & van Dijken, G. L. (2015). Continued increases in Arctic Ocean  
576 primary production. *Progress in Oceanography*, 136, 60–70.
- 577 Bolyen, E., Rideout, J. R., Dillon, M. R., Bokulich, N. A., Abnet, C. C., Al-Ghalith, G.  
578 A., Alexander, H., Alm, E. J., Arumugam, M., Asnicar, F., Bai, Y., Bisanz, J. E.,  
579 Bittinger, K., Brejnrod, A., Brislawn, C. J., Brown, C. T., Callahan, B. J.,  
580 Caraballo-Rodríguez, A. M., Chase, J., ... Caporaso, J. G. (2019). Reproducible,  
581 interactive, scalable and extensible microbiome data science using QIIME 2.  
582 *Nature Biotechnology*, 37(8), 852–857.
- 583 Bougeard, S., & Dray, S. (2018). Supervised multiblock analysis in R with the ade4  
584 package. *Journal of Statistical Software*, 86(1), 1–17.
- 585 Bowman, T. E., & Kornicker, L. S. (1967). Two New Crustaceans: The Parasitic  
586 Copepod *Sphaeronellopsis monothrix* (Choniostomatidae) and Its Myodocopid  
587 Ostracod Host *Parasterope pollex* (Cylindroleberidae) from the Southern New

- 588 England Coast. Proceedings of the United States National Museum. *Proceedings*  
589 *of the United States National Museum*, 123(3613), 1–28.
- 590 Brussaard, C. P. D., Kempers, R. S., Kop, A. J., Riegman, R., & Heldal, M. (1996).  
591 Virus-like particles in a summer bloom of *Emiliana huxleyi* in the North Sea.  
592 *Aquatic Microbial Ecology*, 10(2), 105–113.
- 593 Callahan, B. J., McMurdie, P. J., Rosen, M. J., Han, A. W., Johnson, A. J. A., &  
594 Holmes, S. P. (2016). DADA2: High-resolution sample inference from Illumina  
595 amplicon data. *Nature Methods*, 13(7), 581–583.
- 596 Caron, D. A., Alexander, H., Allen, A. E., Archibald, J. M., Armbrust, E. V., Bachy,  
597 C., Bell, C. J., Bharti, A., Dyhrman, S. T., Guida, S. M., Heidelberg, K. B., Kaye,  
598 J. Z., Metzner, J., Smith, S. R., & Worden, A. Z. (2016). Probing the evolution,  
599 ecology and physiology of marine protists using transcriptomics. *Nature Reviews*  
600 *Microbiology*, 15(1), 6–20.
- 601 Chaffron, S., Delage, E., Budinich, M., Vintache, D., Henry, N., Nef, C., Ardyna, M.,  
602 Zayed, A., Junger, P., Galand, P., Lovejoy, C., Murray, A., Sarmiento, H., Oceans  
603 coordinators, T., Acinas, S., Babin, M., Iudicone, D., Jaillon, O., Karsenti, E., ...  
604 Eveillard, D. (2020). Environmental vulnerability of the global ocean plankton  
605 community interactome. *BioRxiv*, 2020.11.09.375295.
- 606 Christopher B. Field, Michael J. Behrenfeld, James T. Randerson, P. F. (1998).  
607 Primary Production of the Biosphere: Integrating Terrestrial and Oceanic  
608 Components. *Biochemical Society Transactions*, 281, 237–240.

- 609 Clerissi, C., Desdevises, Y., & Grimsley, N. (2012). Prasinoviruses of the Marine  
610 Green Alga *Ostreococcus tauri* Are Mainly Species Specific. *Journal of Virology*,  
611 86(8), 4611–4619.
- 612 Comeau, A. M., Li, W. K. W., Tremblay, J. É., Carmack, E. C., & Lovejoy, C. (2011).  
613 Arctic ocean microbial community structure before and after the 2007 record sea  
614 ice minimum. *PLoS ONE*, 6(11).
- 615 Curry, J. A., Schramm, J. L., & Ebert, E. E. (1995). Sea ice-albedo climate feedback  
616 mechanism. In *Journal of Climate*. 8(2), 240–247.
- 617 de Vargas, C., Audic, S., Nicolas Henry, Decelle, J., Mahé, F., Ramiro Logares,  
618 Enrique Lara, & Cédric Berney. (2015). Eukaryotic plankton diversity in the  
619 sunlit ocean. *Science*, 348(6237), 1261605-1/11.
- 620 Demory, D., Arsenieff, L., Simon, N., Six, C., Rigaut-Jalabert, F., Marie, D., Ge, P.,  
621 Bigeard, E., Jacquet, S., Sciandra, A., Bernard, O., Rabouille, S., & Baudoux, A.  
622 C. (2017). Temperature is a key factor in *Micromonas*-virus interactions. *ISME*  
623 *Journal*, 11(3), 601–612.
- 624 Demory, D., Weitz, J. S., Baudoux, A. C., Touzeau, S., Simon, N., Rabouille, S.,  
625 Sciandra, A., & Bernard, O. (2021). A thermal trade-off between viral  
626 production and degradation drives virus-phytoplankton population dynamics.  
627 *Ecology Letters*, 24(6), 1133–1144.
- 628 Endo, H., Yoshimura, T., Kataoka, T., & Suzuki, K. (2013). Effects of CO<sub>2</sub> and iron  
629 availability on phytoplankton and eubacterial community compositions in the

- 630 northwest subarctic Pacific. *Journal of Experimental Marine Biology and*  
631 *Ecology*, 439, 160–175.
- 632 Endo, Hisashi, Blanc-Mathieu, R., Li, Y., Salazar, G., Henry, N., Labadie, K., de  
633 Vargas, C., Sullivan, M. B., Bowler, C., Wincker, P., Karp-Boss, L., Sunagawa,  
634 S., & Ogata, H. (2020). Biogeography of marine giant viruses reveals their  
635 interplay with eukaryotes and ecological functions. *Nature Ecology and*  
636 *Evolution*, 4(12), 1639–1649.
- 637 Endo, Hisashi, Ogata, H., & Suzuki, K. (2018). Contrasting biogeography and  
638 diversity patterns between diatoms and haptophytes in the central Pacific Ocean.  
639 *Scientific Reports*, 8(10916), 1–13.
- 640 Falkowski, P. G., Barber, R. T., & Smetacek, V. (1998). Biogeochemical controls and  
641 feedbacks on ocean primary production. *Science*, 281(5374), 200–206.
- 642 Fujiwara, A., Hirawake, T., Suzuki, K., Imai, I., & Saitoh, S. I. (2014). Timing of sea  
643 ice retreat can alter phytoplankton community structure in the western Arctic  
644 Ocean. *Biogeosciences*, 11(7), 1705–1716.
- 645 Gordon, L. I., Jennings, J. C., Ross, A. A., & Krest, J. M. (1993). A suggested  
646 protocol for continuous flow automated analysis of seawater nutrients (phosphate,  
647 nitrate, nitrite and silicic acid) in the WOCE Hydrographic. *WOCE Operations*  
648 *Manual*, 3(3.1), Part 3.1.3.



- 649 Hamilton, A. K., Lovejoy, C., Galand, P. E., & Ingram, R. G. (2008). Water masses  
650 and biogeography of picoeukaryote assemblages in a cold hydrographically  
651 complex system. *Limnology and Oceanography*, 53(3), 922–935.
- 652 Hare, C. E., Leblanc, K., DiTullio, G. R., Kudela, R. M., Zhang, Y., Lee, P. A.,  
653 Riseman, S., & Hutchins, D. A. (2007). Consequences of increased temperature  
654 and CO<sub>2</sub> for phytoplankton community structure in the Bering Sea. *Marine*  
655 *Ecology Progress Series*, 352, 9–16.
- 656 Hill, V. J., Matrai, P. A., Olson, E., Suttles, S., Steele, M., Codispoti, L. A., &  
657 Zimmerman, R. C. (2013). Synthesis of integrated primary production in the  
658 Arctic Ocean: II. In situ and remotely sensed estimates. *Progress in*  
659 *Oceanography*, 110, 107–125.
- 660 Hirche, H. J., & Niehoff, B. (1996). Reproduction of the Arctic copepod *Calanus*  
661 *hyperboreus* in the Greenland Sea-field and laboratory observations. *Polar*  
662 *Biology*, 16(3), 209–219.
- 663 Holm, S. (1979). A simple sequentially rejective multiple test procedure.  
664 *Scandinavian Journal of Statistics*, 6(2), 65–70.
- 665 Ibarbalz, F. M., Henry, N., Lombard, F., Bowler, C., Zinger, L., Busseni, G., & Byrne,  
666 H. (2019). Global Trends in Marine Plankton Diversity across Kingdoms of Life  
667 AR OCEANS EXPEDITION Article Global Trends in Marine Plankton  
668 Diversity across Kingdoms of Life. *Cell*, 179, 1084–1097.

- 669 Iyer, L. M., Balaji, S., Koonin, E. V., & Aravind, L. (2006). Evolutionary genomics of  
670 nucleo-cytoplasmic large DNA viruses. *Virus Research*, *117*(1), 156–184.
- 671 Joli, N., Gosselin, M., Ardyna, M., Babin, M., Onda, D. F., Tremblay, J. É., &  
672 Lovejoy, C. (2018). Need for focus on microbial species following ice melt and  
673 changing freshwater regimes in a Janus Arctic Gateway. *Scientific Reports*,  
674 *8*(9405), 1–11.
- 675 Jones, E. P. (2001). Circulation in the Arctic Ocean. *Polar Research*, *20*(2), 139–146.
- 676 Jung, J., Cho, K. H., Park, T., Yoshizawa, E., Lee, Y., Yang, E. J., Gal, J. K., Ha, S.  
677 Y., Kim, S., Kang, S. H., & Grebmeier, J. M. (2021). Atlantic-Origin Cold Saline  
678 Water Intrusion and Shoaling of the Nutricline in the Pacific Arctic. *Geophysical*  
679 *Research Letters*, *48*(6), 1–10.
- 680 Kashiwase, H., Ohshima, K. I., Nihashi, S., & Eicken, H. (2017). Evidence for  
681 ice-ocean albedo feedback in the Arctic Ocean shifting to a seasonal ice zone.  
682 *Scientific Reports*, *7*(8170), 1–10.
- 683 Katoh, K., Misawa, K., Kuma, K. I., & Miyata, T. (2002). MAFFT: A novel method  
684 for rapid multiple sequence alignment based on fast Fourier transform. *Nucleic*  
685 *Acids Research*, *30*(14), 3059–3066.
- 686 Katoh, K., & Standley, D. M. (2013). MAFFT multiple sequence alignment software  
687 version 7: Improvements in performance and usability. *Molecular Biology and*  
688 *Evolution*, *30*(4), 772–780.

- 689 Kiliyas, E., Kattner, G., Wolf, C., Frickenhaus, S., & Metfies, K. (2014). A molecular  
690 survey of protist diversity through the central Arctic Ocean. *Polar Biology*, 37(9),  
691 1271–1287.
- 692 Knight, R., Vrbnac, A., Taylor, B. C., Aksenov, A., Callewaert, C., Debelius, J.,  
693 Gonzalez, A., Kosciolk, T., McCall, L. I., McDonald, D., Melnik, A. V.,  
694 Morton, J. T., Navas, J., Quinn, R. A., Sanders, J. G., Swafford, A. D.,  
695 Thompson, L. R., Tripathi, A., Xu, Z. Z., ... Dorrestein, P. C. (2018). Best  
696 practices for analysing microbiomes. *Nature Reviews Microbiology*, 16(7),  
697 410–422.
- 698 Ko, E., Gorbunov, M. Y., Jung, J., Joo, H. M., Lee, Y., Cho, K. H., Yang, E. J., Kang,  
699 S. H., & Park, J. (2020). Effects of Nitrogen Limitation on Phytoplankton  
700 Physiology in the Western Arctic Ocean in Summer. In *Journal of Geophysical*  
701 *Research: Oceans*. 125(11).
- 702 Kosobokova, K. N., Hopcroft, R. R., & Hirche, H. J. (2011). Patterns of zooplankton  
703 diversity through the depths of the Arctic's central basins. *Marine Biodiversity*,  
704 41(1), 29–50.
- 705 Kwok, R., & Cunningham, G. F. (2010). Contribution of melt in the Beaufort Sea to  
706 the decline in Arctic multiyear sea ice coverage: 1993-2009. *Geophysical*  
707 *Research Letters*, 37(20), 1–5.

- 708 Kyeong, A. S., Hae, J. J., Kim, S., Gwang, H. K., & Jung, H. K. (2006). Bacterivory  
709 by co-occurring red-tide algae, heterotrophic nanoflagellates, and ciliates.  
710 *Marine Ecology Progress Series*, 322(September), 85–97.
- 711 Lannuzel, D., Tedesco, L., van Leeuwe, M., Campbell, K., Flores, H., Delille, B.,  
712 Miller, L., Stefels, J., Assmy, P., Bowman, J., Brown, K., Castellani, G., Chierici,  
713 M., Crabeck, O., Damm, E., Else, B., Fransson, A., Fripiat, F., Geilfus, N. X., ...  
714 Wongpan, P. (2020). The future of Arctic sea-ice biogeochemistry and  
715 ice-associated ecosystems. *Nature Climate Change*, 10(11), 983–992.
- 716 Lee, J., Kang, S. H., Yang, E. J., Macdonald, A. M., Joo, H. M., Park, J., Kim, K., Lee,  
717 G. S., Kim, J. H., Yoon, J. E., Kim, S. S., Lim, J. H., & Kim, I. N. (2019).  
718 Latitudinal Distributions and Controls of Bacterial Community Composition  
719 during the Summer of 2017 in Western Arctic Surface Waters (from the Bering  
720 Strait to the Chukchi Borderland). *Scientific Reports*, 9(16822), 1–10.
- 721 Lee, Y., Min, J. O., Yang, E. J., Cho, K. H., Jung, J., Park, J., Moon, J. K., & Kang, S.  
722 H. (2019). Influence of sea ice concentration on phytoplankton community  
723 structure in the Chukchi and East Siberian Seas, Pacific Arctic Ocean. *Deep-Sea*  
724 *Research Part I: Oceanographic Research Papers*, 147(June 2018), 54–64.
- 725 Lee, Y., Yang, E. J., Park, J., Jung, J., Kim, T. W., & Lee, S. H. (2016).  
726 Physical-biological coupling in the Amundsen Sea, Antarctica: Influence of  
727 physical factors on phytoplankton community structure and biomass. *Deep-Sea*  
728 *Research Part I: Oceanographic Research Papers*, 117, 51–60.

- 729 Legendre, P., & Andersson, M. J. (1999). Distance-based redundancy analysis:  
730 Testing multispecies responses in multifactorial ecological experiments.  
731 *Ecological Monographs*, 69(1), 1–24.
- 732 Letunic, I., & Bork, P. (2019). Interactive Tree of Life (iTOL) v4: Recent updates and  
733 new developments. *Nucleic Acids Research*, 47(W1), 2–5.
- 734 Lewis, K. M., Van Dijken, G. L., & Arrigo, K. R. (2020). Changes in phytoplankton  
735 concentration now drive increased Arctic Ocean primary production. *Science*,  
736 369(6500), 198–202.
- 737 Li, W. K. W., McLaughlin, F. A., Lovejoy, C., & Carmack, E. C. (2009). Smallest  
738 algae thrive as the arctic ocean freshens. *Science*, 326(5952), 539.
- 739 Li, Y., Endo, H., Gotoh, Y., Watai, H., Ogawa, N., Blanc-Mathieu, R., Yoshida, T., &  
740 Ogata, H. (2019). The earth is small for “leviathans”: Long distance dispersal of  
741 giant viruses across aquatic environments. *Microbes and Environments*, 34(3),  
742 334–339.
- 743 Li, Y., Hingamp, P., Watai, H., Endo, H., Yoshida, T., & Ogata, H. (2018).  
744 Degenerate PCR primers to reveal the diversity of giant viruses in coastal waters.  
745 *Viruses*, 10(9), 1–16.
- 746 Lima-Mendez, G., Faust, K., Henry, N., Decelle, J., Colin, S., Carcillo, F., Chaffron,  
747 S., Cesar Ignacio-Espinosa, J., Roux, S., Vincent, F., Bittner, L., Darzi, Y., Wang,  
748 J., Audic, S., Berline, L., Bontempi, G., Cabello, A. M., Coppola, L.,

- 749 Cornejo-Castillo, F. M., ... Raes, J. (2015). 24 Silvia G. Acinas, 12 Shinichi  
750 Sunagawa, 17 Peer Bork. *Science*, 10(6237), 1–10.
- 751 Lindsay, R., Haas, C., Hendricks, S., Hunkeler, P., Kurtz, N., Paden, J., Panzer, B.,  
752 Sonntag, J., Yungel, J., & Zhang, J. (2012). Seasonal forecasts of Arctic sea ice  
753 initialized with observations of ice thickness. *Geophysical Research Letters*,  
754 39(21), 1–6.
- 755 Lovejoy, C., Massana, R., & Pedrós-Alió, C. (2006). Diversity and distribution of  
756 marine microbial eukaryotes in the arctic ocean and adjacent seas. *Applied and*  
757 *Environmental Microbiology*, 72(5), 3085–3095.
- 758 Majaneva, M., Rintala, J. M., Piisilä, M., Fewer, D. P., & Blomster, J. (2012).  
759 Comparison of wintertime eukaryotic community from sea ice and open water in  
760 the Baltic Sea, based on sequencing of the 18S rRNA gene. *Polar Biology*, 35(6),  
761 875–889.
- 762 Mantel, N. (1967). The Detection of Disease Clustering and a Generalized Regression  
763 Approach. *Nature*, 27(Part 1), 209–220.
- 764 Marquardt, M., Vader, A., Stübner, E. I., Reigstad, M., & Gabrielsen, T. M. (2016).  
765 Strong seasonality of marine microbial eukaryotes in a high-Arctic fjord  
766 (Isfjorden, in West Spitsbergen, Norway). *Applied and Environmental*  
767 *Microbiology*, 82(6), 1868–1880.

- 768 Matsen, F. A., Kodner, R. B., & Armbrust, E. V. (2010). pplacer: linear time  
769 maximum-likelihood and Bayesian phylogenetic placement of sequences onto a  
770 fixed reference tree. *BMC Bioinformatics*, *11*(1), 538.
- 771 Meng, L., Endo, H., Blanc-Mathieu, R., Chaffron, S., Hernández-Velázquez, R.,  
772 Kaneko, H., & Ogata, H. (2021). Quantitative Assessment of Nucleocytoplasmic  
773 Large DNA Virus and Host Interactions Predicted by Co-occurrence Analyses.  
774 *MSphere*, *6*(2), 1–18.
- 775 Middelboe, M., & Brussaard, C. P. D. (2017). Marine viruses: Key players in marine  
776 ecosystems. *Viruses*, *9*(10), 1–6.
- 777 Mihara, T., Koyano, H., Hingamp, P., Grimsley, N., Goto, S., & Ogata, H. (2018).  
778 Taxon richness of “Megaviridae” exceeds those of bacteria and archaea in the  
779 ocean. *Microbes and Environments*, *33*(2), 162–171.
- 780 Millette, N. C., Stoecker, D. K., & Pierson, J. J. (2015). Top-down control by micro-  
781 and mesozooplankton on winter dinoflagellate blooms of *Heterocapsa rotundata*.  
782 *Aquatic Microbial Ecology*, *76*(1), 15–25.
- 783 Monier, A., Terrado, R., Thaler, M., Comeau, A., Medrinal, E., & Lovejoy, C. (2013).  
784 Upper Arctic Ocean water masses harbor distinct communities of heterotrophic  
785 flagellates. *Biogeosciences*, *10*(6), 4273–4286.
- 786 Münchow, A. (2016). Volume and freshwater flux observations from Nares Strait to  
787 the west of Greenland at daily time scales from 2003 to 2009. *Journal of*  
788 *Physical Oceanography*, *46*(1), 141–157.

- 789 Nagasaki, K., Ando, M., Itakura, S., Imai, I., & Ishida, Y. (1994). Viral mortality in  
790 the final stage of *Heterosigma akashiwo* (Raphidophyceae) red tide. *Journal of*  
791 *Plankton Research*, 16(11), 1595–1599.
- 792 Oksanen, A. J., Blanchet, F. G., Friendly, M., Kindt, R., Legendre, P., Mcglinn, D.,  
793 Minchin, P. R., Hara, R. B. O., Simpson, G. L., Solymos, P., Stevens, M. H. H.,  
794 & Szoecs, E. (2018). *Package ‘vegan.’ April.*
- 795 Onda, D. F. L., Medrinal, E., Comeau, A. M., Thaler, M., Babin, M., & Lovejoy, C.  
796 (2017). Seasonal and interannual changes in ciliate and dinoflagellate species  
797 assemblages in the Arctic Ocean (Amundsen Gulf, Beaufort Sea, Canada).  
798 *Frontiers in Marine Science*, 4(16), 1–14.
- 799 Peng, H. T., Ke, C. Q., Shen, X., Li, M., & Shao, Z. De. (2020). Summer albedo  
800 variations in the Arctic Sea ice region from 1982 to 2015. *International Journal*  
801 *of Climatology*, 40(6), 3008–3020.
- 802 Perovich, D. K., & Jones, K. F. (2014). Arctic Report 2019. *Journal of Geophysical*  
803 *Research: Oceans*, 119(12), 8767–8777.
- 804 Praetorius, S., Rugenstein, M., Persad, G., & Caldeira, K. (2018). Global and Arctic  
805 climate sensitivity enhanced by changes in North Pacific heat flux. *Nature*  
806 *Communications*, 9(1), 1–12.
- 807 Proding, F., Endo, H., Gotoh, Y., Li, Y., Morimoto, D., Omae, K., Tominaga, K.,  
808 Blanc-Mathieu, R., Takano, Y., Hayashi, T., Nagasaki, K., Yoshida, T., & Ogata,



- 809 H. (2020). An optimized metabarcoding method for mimiviridae.  
810 *Microorganisms*, 8(4), 1–17.
- 811 Prodinge, F., Endo, H., Takano, Y., Li, Y., Tominaga, K., Isozaki, T., Blanc-Mathieu,  
812 R., Gotoh, Y., Tetsuya, H., Taniguchi, E., Nagasaki, K., Yoshida, T., & Ogata, H.  
813 (2021). Year-round dynamics of amplicon sequence variant communities differ  
814 among eukaryotes, Mimiviridae, and prokaryotes in a coastal ecosystem.  
815 *BioRxiv*.
- 816 Proshutinsky, A., Krishfield, R., Toole, J. M., Timmermans, M. L., Williams, W.,  
817 Zimmermann, S., Yamamoto-Kawai, M., Armitage, T. W. K., Dukhovskoy, D.,  
818 Golubeva, E., Manucharyan, G. E., Platov, G., Watanabe, E., Kikuchi, T.,  
819 Nishino, S., Itoh, M., Kang, S. H., Cho, K. H., Tateyama, K., & Zhao, J. (2019).  
820 Analysis of the Beaufort Gyre Freshwater Content in 2003–2018. *Journal of*  
821 *Geophysical Research: Oceans*, 124(12), 9658–9689.
- 822 Quast, C., Pruesse, E., Yilmaz, P., Gerken, J., Schweer, T., Yarza, P., Peplies, J., &  
823 Glöckner, F. O. (2013). The SILVA ribosomal RNA gene database project:  
824 Improved data processing and web-based tools. *Nucleic Acids Research*, 41(D1),  
825 590–596.
- 826 Rognes, T., Flouri, T., Nichols, B., Quince, C., & Mahé, F. (2016). VSEARCH: A  
827 versatile open source tool for metagenomics. *PeerJ*, 2016(10), 1–22.
- 828 Rohwer, F., & Thurber, R. V. (2009). Viruses manipulate the marine environment.  
829 *Nature*, 459(7244), 207–212.

- 830 Sandaa, R. A., Storesund, J. E., Olesin, E., Paulsen, M. L., Larsen, A., Bratbak, G., &  
831 Ray, J. L. (2018). Seasonality drives microbial community structure, shaping  
832 both eukaryotic and prokaryotic host–viral relationships in an arctic marine  
833 ecosystem. *Viruses*, *10*(12), 1–22.
- 834 Sherr, B. F., Sherr, E. B., Caron, D. A., Vaultot, D., & Worden, A. Z. (2007). Oceanic  
835 protists. *Oceanography*, *20*(2), 130–134.
- 836 Shu, Q., Qiao, F., Song, Z., Zhao, J., & Li, X. (2018). Projected Freshening of the  
837 Arctic Ocean in the 21st Century. *Journal of Geophysical Research: Oceans*,  
838 *123*(12), 9232–9244.
- 839 Smouse, P. E., Long, J. C., & Sokal, R. R. (1986). *Multiple Regression and*  
840 *Correlation Mantel Test of Matrix Correspondence*. *35*(4), 627–632.
- 841 Stroeve, J., Holland, M. M., Meier, W., Scambos, T., & Serreze, M. (2007). Arctic sea  
842 ice decline: Faster than forecast. *Geophysical Research Letters*, *34*(9), 1–5.
- 843 Suttle, C. A. (2007). Marine viruses - Major players in the global ecosystem. *Nature*  
844 *Reviews Microbiology*, *5*(10), 801–812.
- 845 Terrado, R., Vincent, W. F., & Lovejoy, C. (2009). Mesopelagic protists: Diversity  
846 and succession in a coastal Arctic ecosystem. *Aquatic Microbial Ecology*, *56*(1),  
847 25–40.
- 848 Thaler, M., & Lovejoy, C. (2013). Environmental selection of marine stramenopile  
849 clades in the Arctic Ocean and coastal waters. *Polar Biology*, *37*(3), 347–357.

- 850 Von Quillfeldt, C. H. (2000). Common diatom species in Arctic spring blooms: Their  
851 distribution and abundance. *Botanica Marina*, 43(6), 499–516.
- 852 Wang, Y. G., Tseng, L. C., Lin, M., & Hwang, J. S. (2019). Vertical and geographic  
853 distribution of copepod communities at late summer in the Amerasian Basin,  
854 Arctic Ocean. *PLoS ONE*, 14(7), 1–23.
- 855 Woodgate, R. (2013). Arctic Ocean circulation : going around at the top of the world.  
856 *Nature Education Knowledge*, 4(8), 8.
- 857 Worden, A. Z., Follows, M. J., Giovannoni, S. J., Wilken, S., Zimmerman, A. E., &  
858 Keeling, P. J. (2015). Rethinking the marine carbon cycle: Factoring in the  
859 multifarious lifestyles of microbes. *Science*, 347(6223), 735–748.
- 860 Xu, D., Kong, H., Yang, E. J., Li, X., Jiao, N., Warren, A., Wang, Y., Lee, Y., Jung, J.,  
861 & Kang, S. H. (2020). Contrasting Community Composition of Active Microbial  
862 Eukaryotes in Melt Ponds and Sea Water of the Arctic Ocean Revealed by High  
863 Throughput Sequencing. *Frontiers in Microbiology*, 11(June), 1–15.
- 864 Zhang, F., He, J., Lin, L., & Jin, H. (2015). Dominance of picophytoplankton in the  
865 newly open surface water of the central Arctic Ocean. *Polar Biology*, 38(7),  
866 1081–1089.
- 867
- 868

869

870 Table 1. R value of Mantel test among different eukaryotic 18S communities in two  
871 types of water (separated based on temperature-salinity diagram), geographic factors,  
872 environmental factors (including temperature, salinity, dissolved inorganic nitrogen  
873 ( $\text{NO}_2+\text{NO}_3+\text{NH}_4$ ), phosphate and silicate) and *Imitervirales polB* gene community.  
874 “*Imitervirales/geographic*” and “*Imitervirales/environmental*” represent the R value  
875 of Partial Mantel test, influences of geographic or environmental factors were  
876 removed. (q-values were listed in Supplement Table S6)

|                                                | NECS (N=12) | AS (N=9) |
|------------------------------------------------|-------------|----------|
| <b>3-144<math>\mu\text{m}</math> eukaryote</b> |             |          |
| geographic factor                              | 0.30        | 0.34     |
| environmental factor                           | -0.02       | 0.75**   |
| <i>Imitervirales</i>                           | 0.66**      | 0.70**   |
| <i>Imitervirales/geographic</i>                | 0.63**      | 0.66**   |
| <i>Imitervirales/environmental</i>             | 0.66**      | 0.50*    |
| <b>0.2-3<math>\mu\text{m}</math> eukaryote</b> |             |          |
| geographic factor                              | 0.44**      | 0.30*    |
| environmental factor                           | -0.06       | 0.86**   |
| <i>Imitervirales</i>                           | 0.65***     | 0.87***  |
| <i>Imitervirales/geographic</i>                | 0.61***     | 0.86***  |
| <i>Imitervirales/environmental</i>             | 0.65***     | 0.90***  |

\*:  $q < 0.05$ ; \*\*:  $q < 0.01$ ; \*\*\*:  $q < 0.001$ .

877

878

879

880 Figures

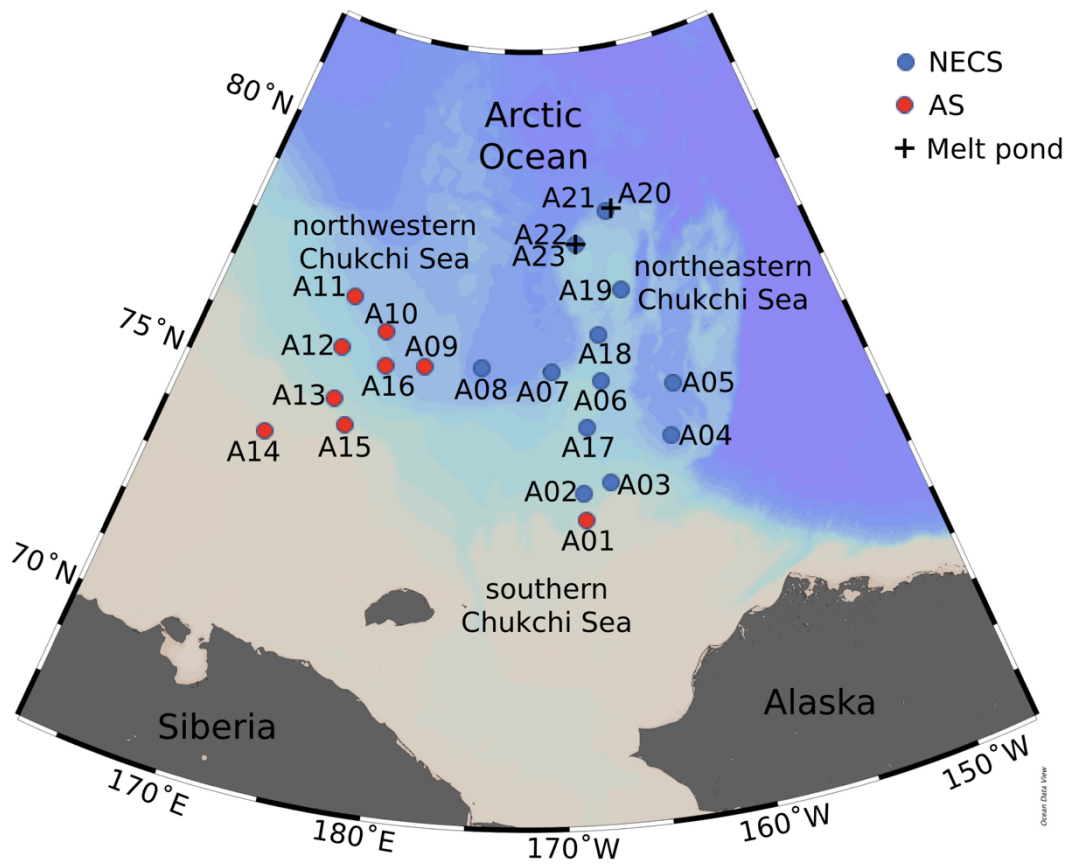

881

882 Fig. 1. Map of Arctic sampling stations of this study. Symbol colors represent water

883 types with different characteristics influenced by current system in this area. NECS:

884 northeastern Chukchi Sea; AS: adjacent sea outside Beaufort Gyre.

885

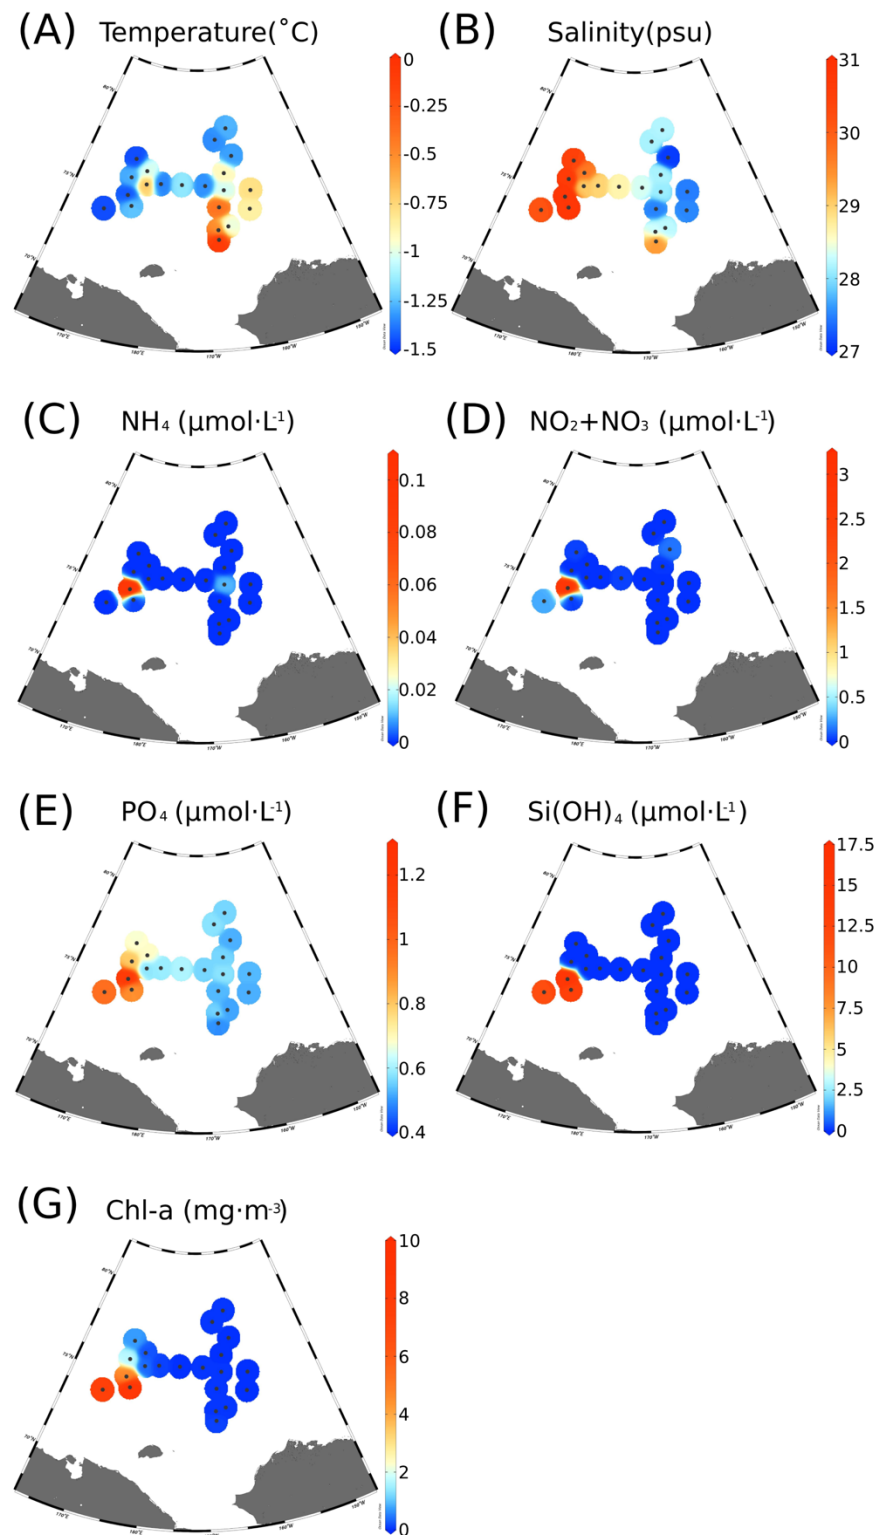

886

887 Fig. 2. Physical and chemical environmental variables among sampling sites: (A)

888 temperature (°C); (B) salinity (psu); (C)  $\text{NH}_4$  ( $\mu\text{mol}\cdot\text{L}^{-1}$ ); (D)  $\text{NO}_2$  and  $\text{NO}_3$

889 ( $\mu\text{mol}\cdot\text{L}^{-1}$ ); (E)  $\text{PO}_4$  ( $\mu\text{mol}\cdot\text{L}^{-1}$ ); (F)  $\text{Si}(\text{OH})_4$  ( $\mu\text{mol}\cdot\text{L}^{-1}$ ); (G)  $\text{Chl } a$  ( $\text{mg}\cdot\text{m}^{-3}$ ).

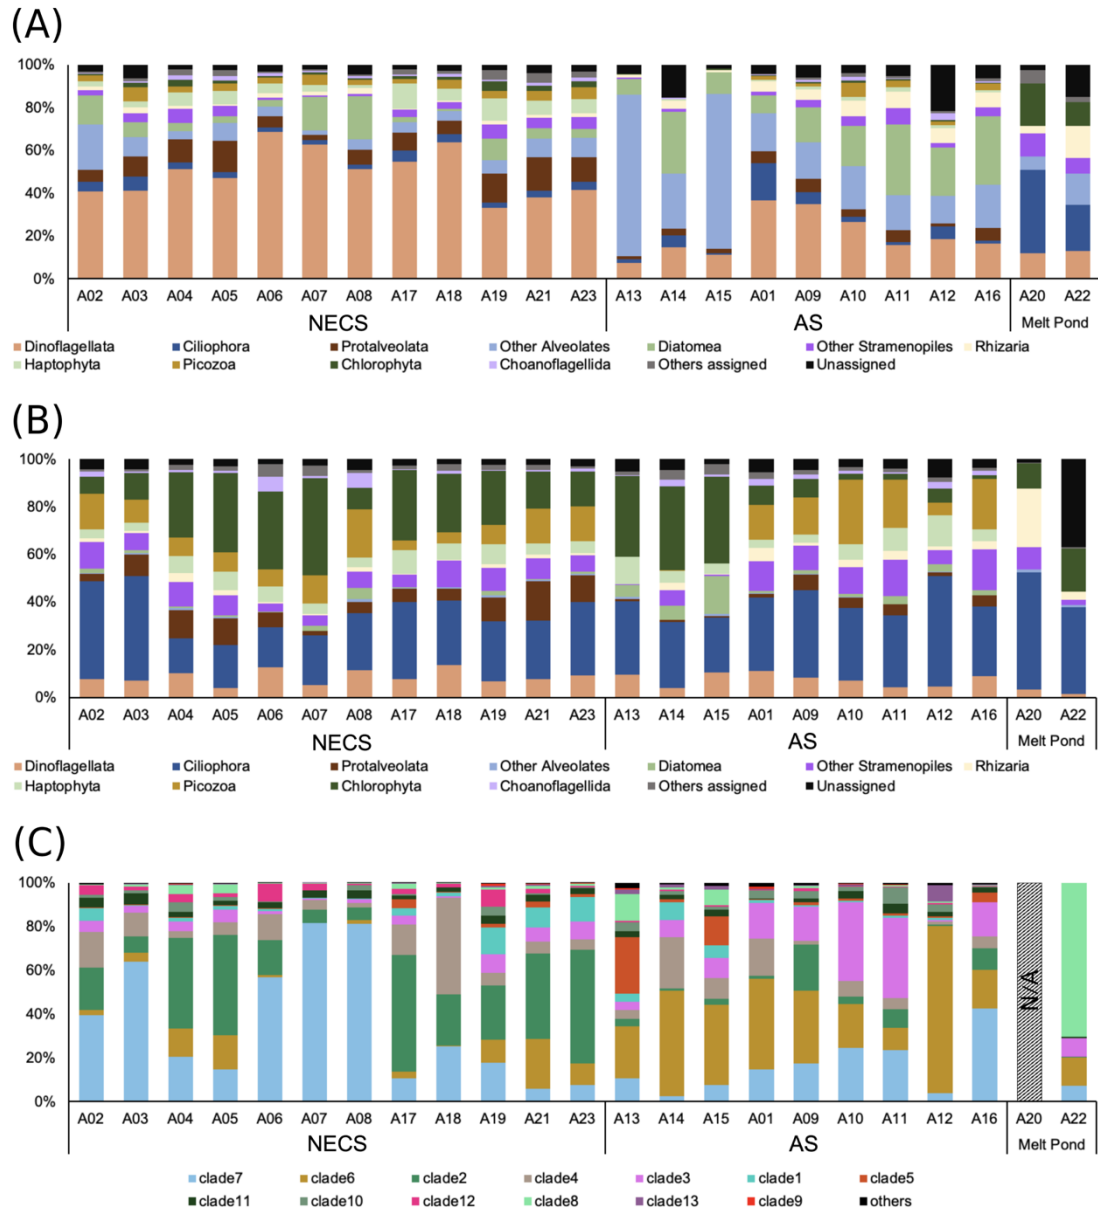

890

891 Fig. 3. Community compositions of eukaryotes and *Imitervirales*. Relative

892 compositions of eukaryotes at phylum level in (A) 3-144 μm fraction and (B) 0.2-3

893 μm fraction and (C) *Imitervirales* in the clade level. The color of each clade of the

894 *Imitervirales* is the same with phylogenetic tree (Fig. S5). Fungi and Metazoa

895 sequences were removed from eukaryotic sequences.

896

897

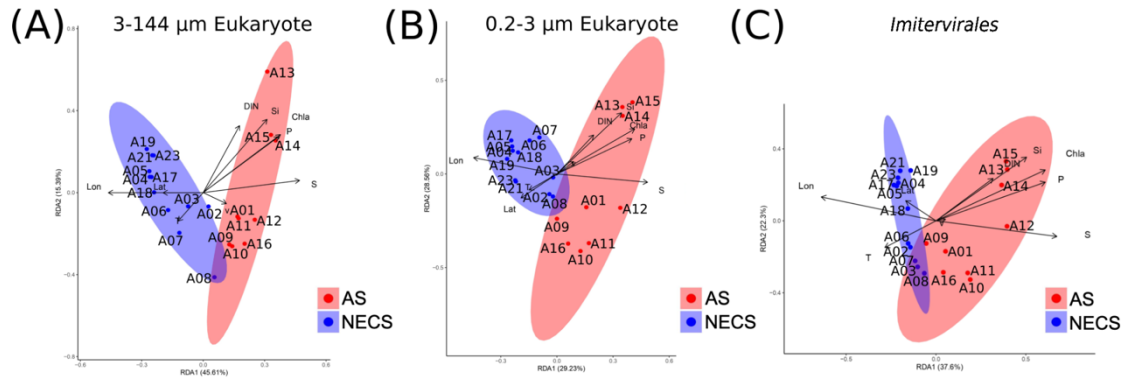

898

899 Fig. 4. dbRDA (distance-based redundancy analysis) ordination diagram of (A) 3-144

900 µm eukaryotic community based on 18S ASVs; (B) 0.2-3 µm eukaryotic community

901 based on 18S ASVs; (C) *Imitervirales* community based on *polB* gene ASVs.

902 Abbreviation of water types: NECS: northeastern Chukchi Sea; AS: adjacent sea

903 outside Beaufort Gyre. Abbreviation of geographic and environmental factors: Lat:

904 latitude; Lon: Longitude; T: temperature; S: salinity; DIN: dissolved inorganic

905 nitrogen (sum of ammonia), nitrite and nitrate; P: phosphate; Si: silicate; Chl *a*:

906 chlorophyll *a*; v: density current velocity.

907

### Number of ASVs

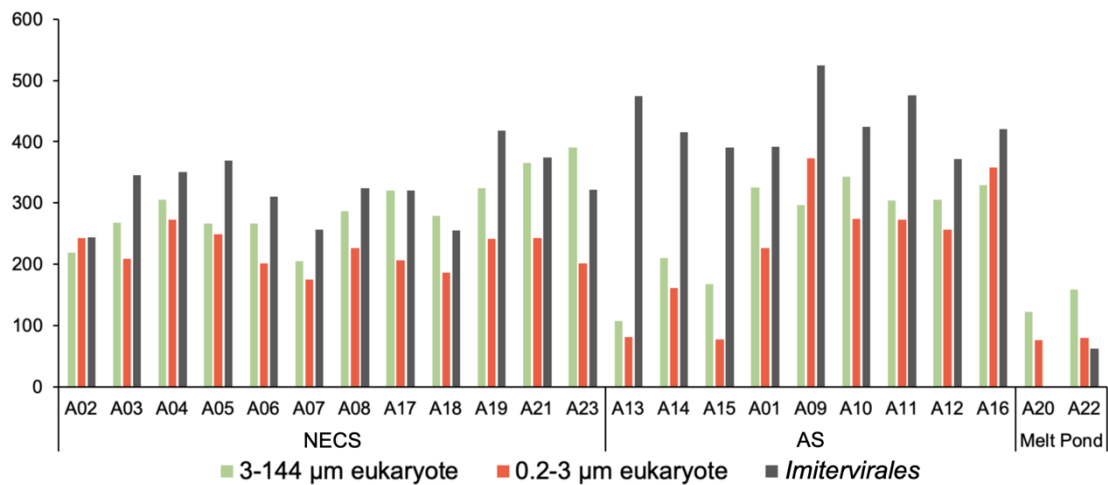

908



909 Fig. S1. Number of non-singleton ASVs of each sample before subsampling. NECS:

910 northeastern Chukchi Sea; AS: adjacent sea outside Beaufort Gyre.

911

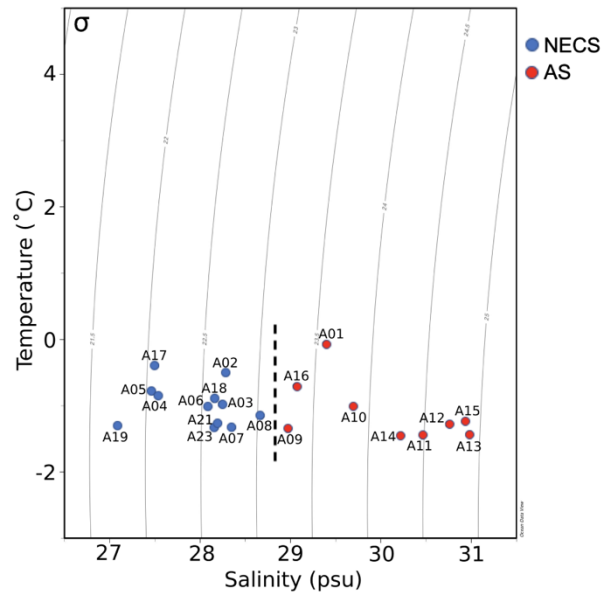

912

913 Fig. S2. TS diagram of all the sampling sites in this study. T: temperature; S: salinity;

914  $\sigma$ : density. NECS: northeastern Chukchi Sea; AS: adjacent sea outside Beaufort Gyre.

915 Dashed line separates the different water types.

916

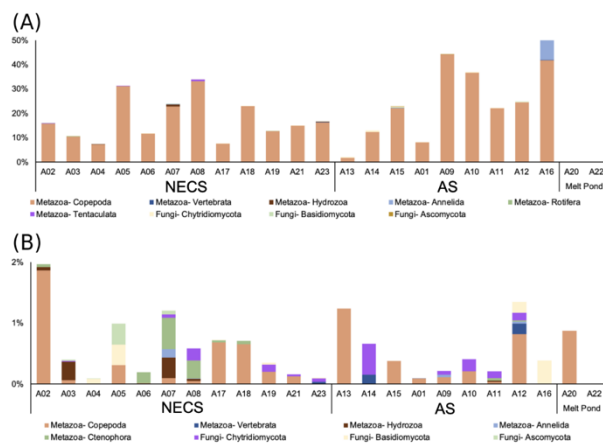

917

918 Fig. S3. Contribution of metazoa and fungi to the total eukaryotic communities in the

919 (A) 3-144 μm fraction and (B) 0.2-3 μm fraction.

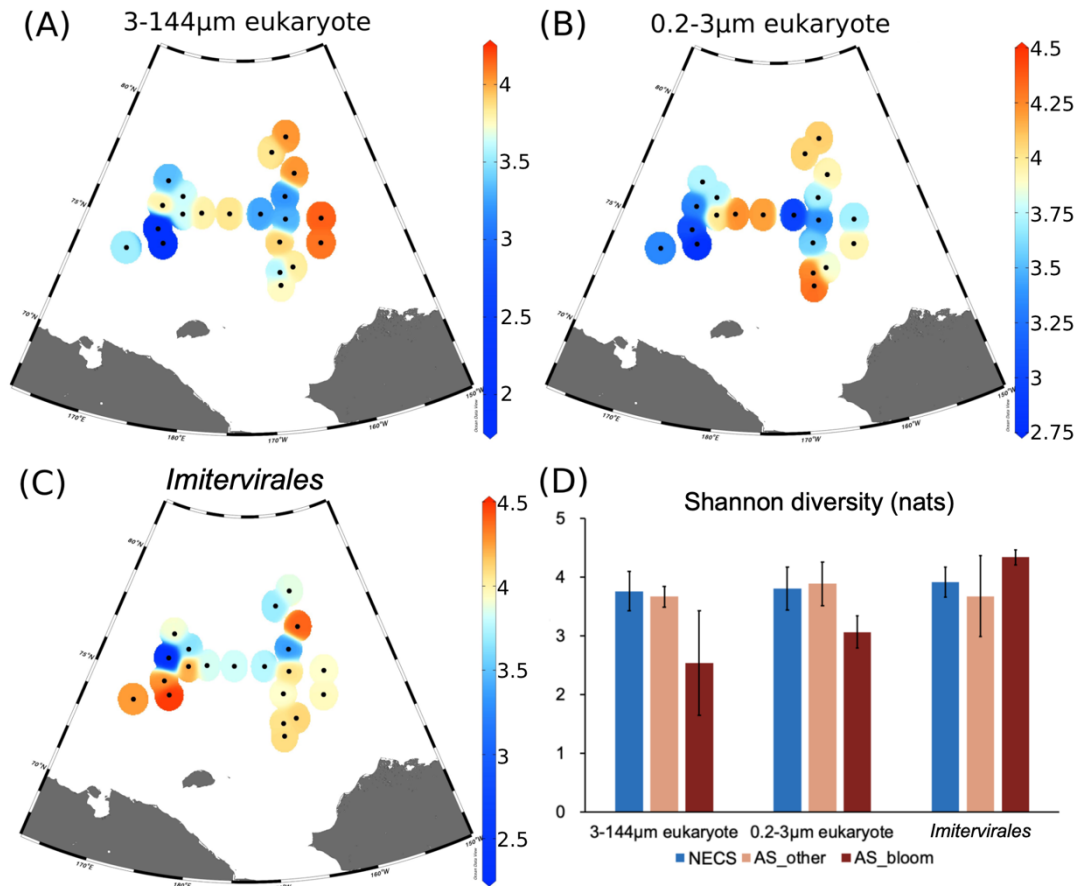

920

921 Fig. S4. Distribution of Shannon diversity index across sampling sites: (A) eukaryotes

922 in the 3-144 µm fraction; (B) eukaryotes in the 0.2-3 µm fraction; (C) *Imitervirales*.

923 (D) Bar plots summarizing the Shannon diversity in water type for the three

924 communities (error bar of ± one standard deviation). Abbreviation of water types:

925 NECS: northeastern Chukchi Sea; AS: adjacent sea outside Beaufort Gyre.

926

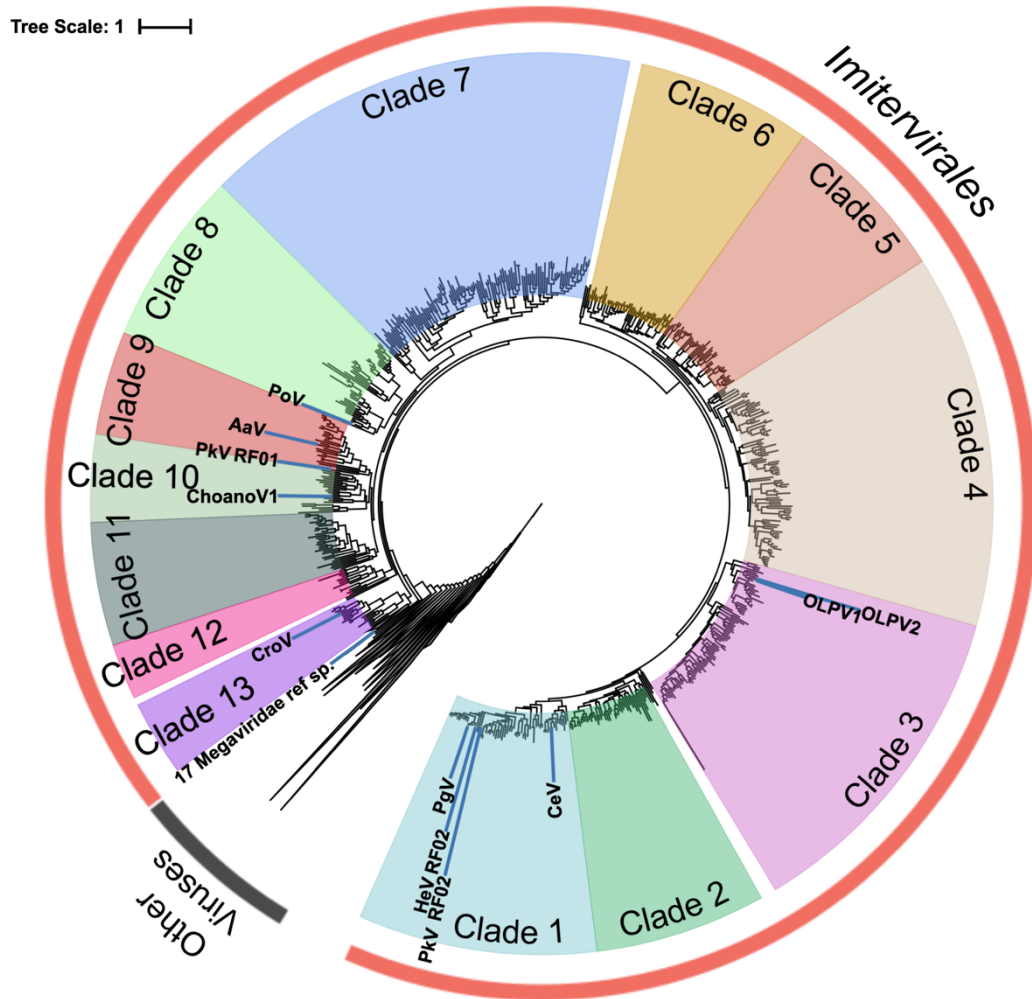

927

928 Fig. S5. Phylogenetic tree built based on marine virus *polB* gene from Tara Ocean  
929 dataset. Clade 1 to 13 are belonging to *Imitervirales*. Reference sequence in the  
930 thirteen clades: PgV (clade 1) - *Phaeocystis globosa* virus; HeV (clade 1)- *Haptolina*  
931 *ericina* virus; PkV (clade 1 and clade 9) - *Prymnesium kappa* viruses; CeV (clade 1) -  
932 *Chrysochromulina ericina* virus; OLPV (clade 3) - Organic Lake Phycodnaviruses;  
933 PoV (clade 8) - *Pyramimonas orientalis* virus; AaV (clade 9) - *Aureococcus*  
934 *anophagefferens* virus; ChoanoV1 (clade 10) – Choanovirus1; CroV (clade 13) -  
935 *Cafeteria roenbergensis* virus.

936

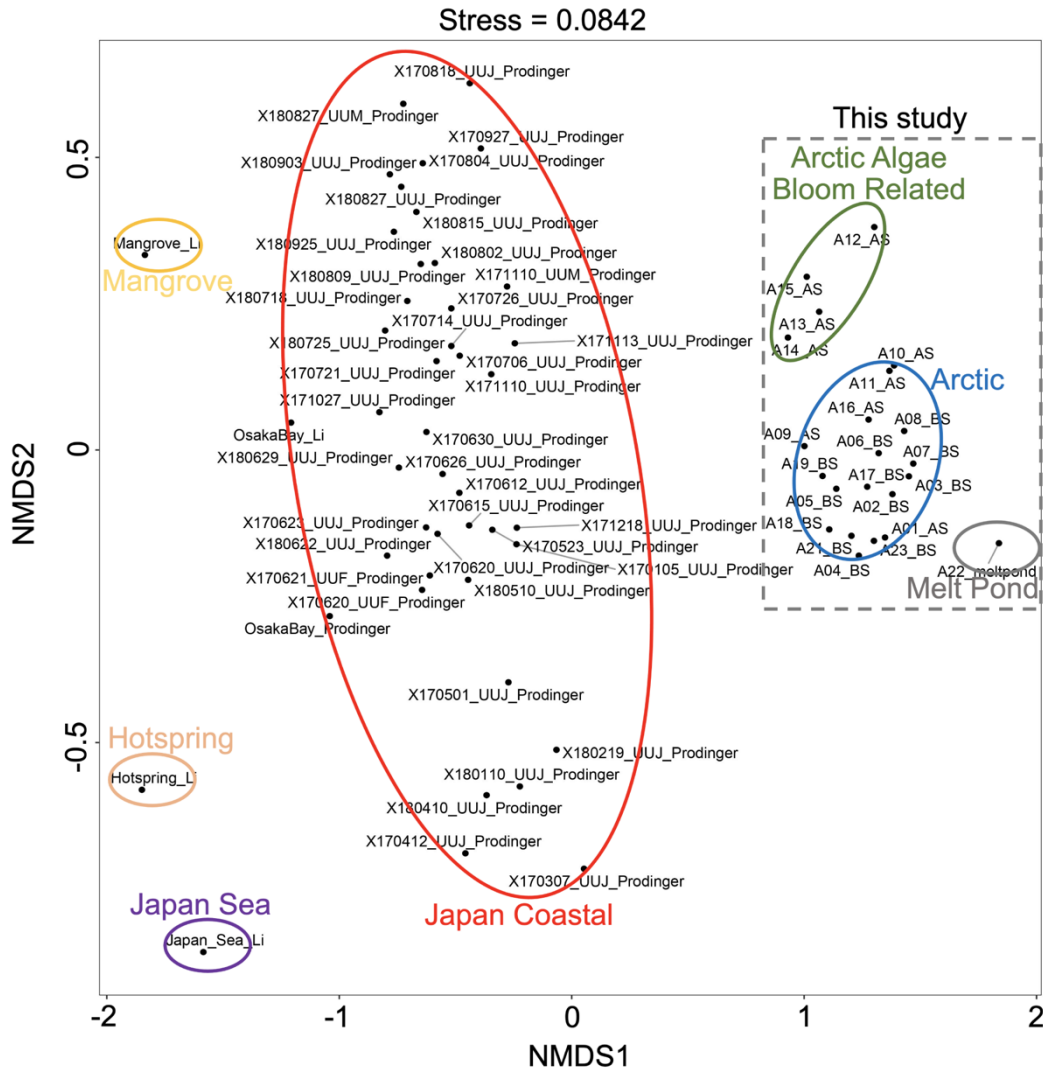

937

938 Fig. S6. Non-metric multidimensional scaling (NMDS) plot with *Imitervirales* ASVs

939 of Arctic samples in this study, hot spring samples, subtropical coastal sea water

940 samples (Li et al., 2019; Prodinge et al., 2020, Prodinge et al., unpublished). ASVs

941 were firstly subsampled by the minimum number of each sample, and relative

942 abundance was calculated by percentage of ASVs in each sample. Bray-Curtis

943 dissimilarity was used to calculate the distance matrix.

944

945

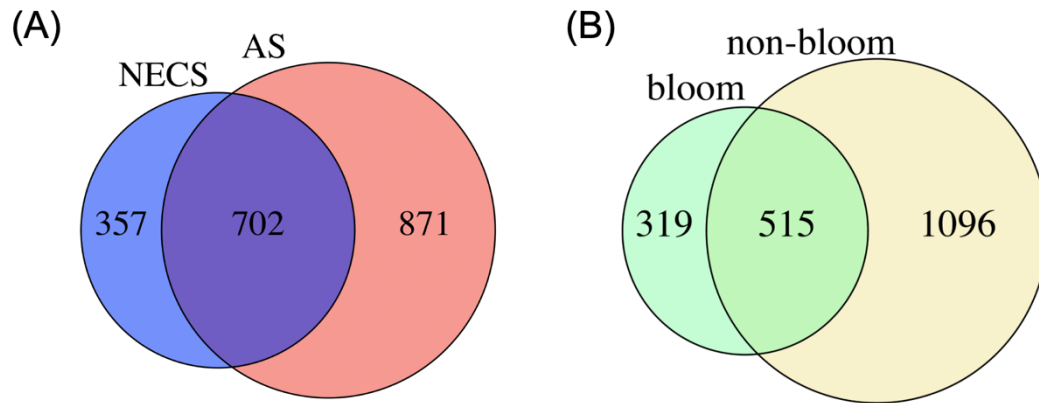

946

947 Fig. S7. Number of unique and common non-singleton *Imitervirales* ASVs between

948 (A) NECS and AS and between (B) bloom and non-bloom sites.

949

950 Dataset S1. Microsoft Excel file includes 10 supplementary tables of sampling data,

951 sequencing data, primer data and secondary result of analysis.
